# Supplementary material
Source: PubMed Central journal article supplement (PMC3434780)
Supplement: supp_M112.017004_FigS2.pdf [file supp_M112.017004_FigS2.pdf]

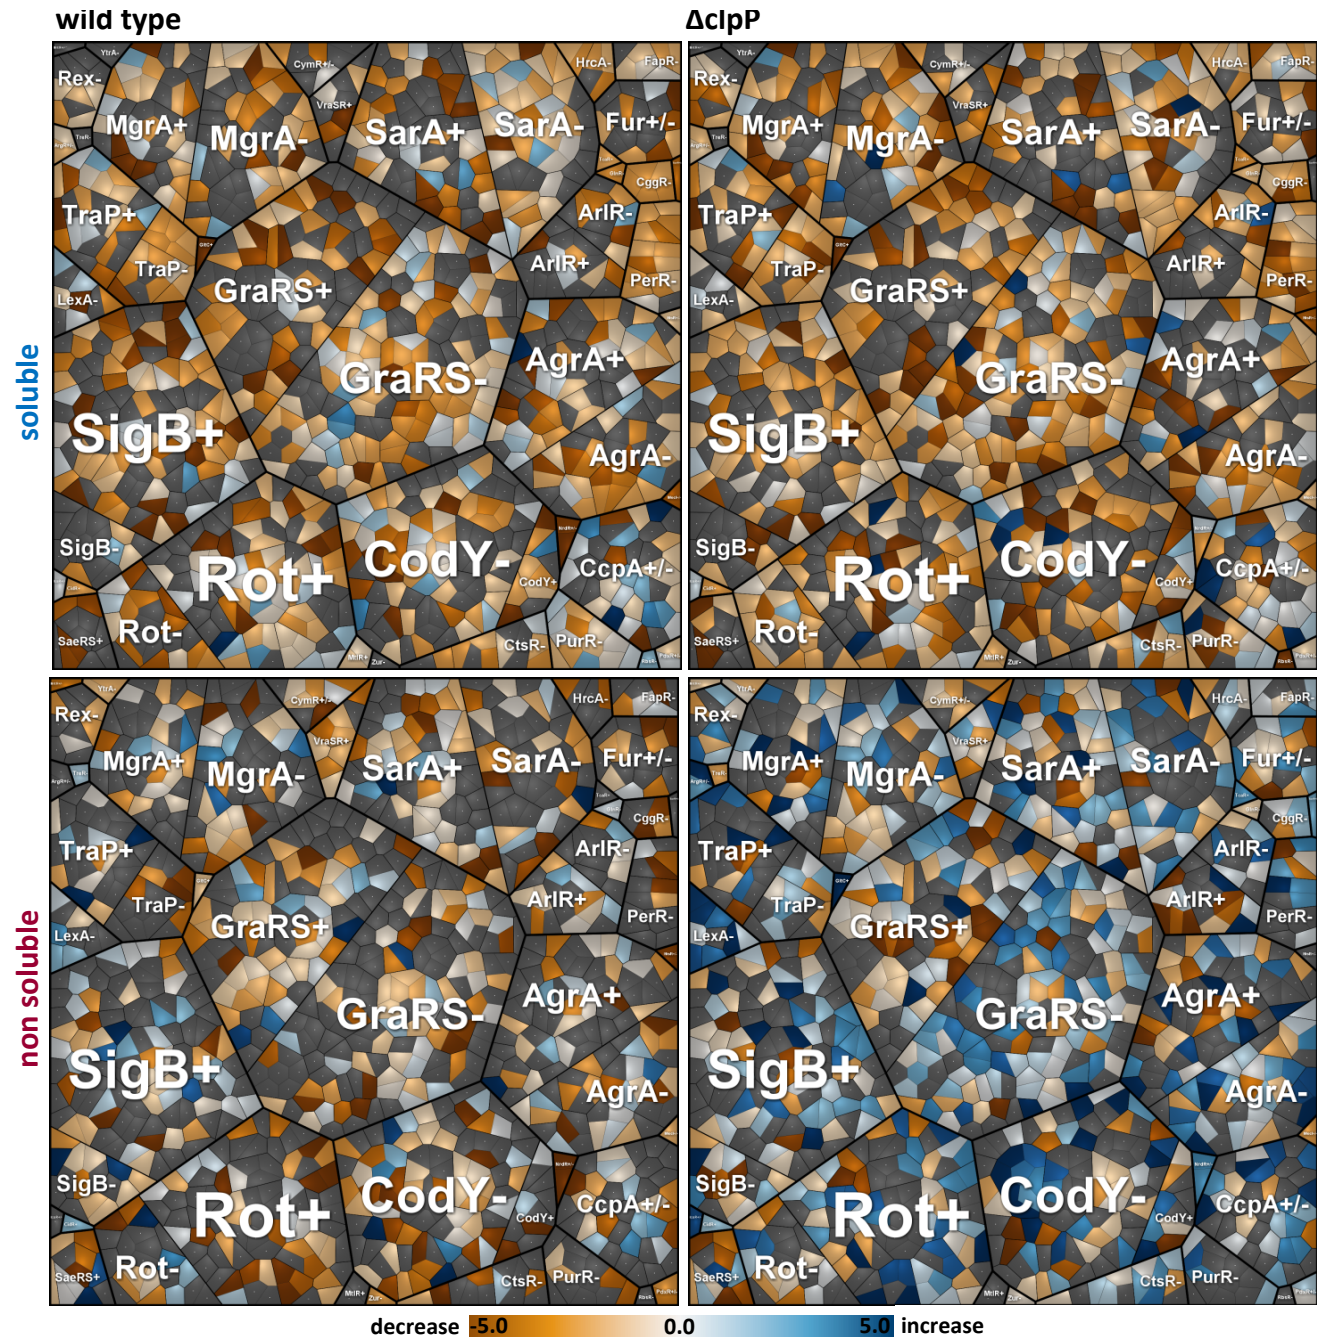

figure S2B

## Figure S2:

A) Treemaps are presented for the visualization of the remaining protein levels ( $^{13}\text{C}/^{15}\text{N}$  – values corrected against isotopic protein dilution due to growth and normalized against the initial  $^{13}\text{C}/^{15}\text{N}$ -value for each fraction) in the wild type and *clpP* mutant as well as for the soluble and the non-soluble fraction.

Proteins were clustered according to functional categories (e.g. protein synthesis)

B) Treemaps are presented for the visualization of the the slope of remaining protein values of specific regulons (e.g. SigB regulon). The linear slope was calculated for each protein out of the  $\log_{10}$   $^{13}\text{C}/^{15}\text{N}$  – values corrected against isotopic protein dilution due to growth and normalized against the initial  $^{13}\text{C}/^{15}\text{N}$ -value for each fraction. Grey polygons indicate undetermined proteins.
