# Supplementary material
Source: PubMed Central journal article supplement (PMC3434780)
Supplement: supp_M112.017004_FigS3.pdf [file supp_M112.017004_FigS3.pdf]

| SACOL     | Name  | Function                                                                        | wild-type (soluble) | wild-type (non-soluble) | clpP mutant (soluble) | clpP mutant (non-soluble) |
|-----------|-------|---------------------------------------------------------------------------------|---------------------|-------------------------|-----------------------|---------------------------|
| SACOL0002 | DnaN  | DNA polymerase III, beta subunit                                                |                     |                         |                       |                           |
| SACOL0050 | Pis   | methicillin-resistant surface protein                                           |                     |                         |                       |                           |
| SACOL0271 | -     | conserved hypothetical protein                                                  |                     |                         |                       |                           |
| SACOL0321 | -     | prophage L54a, repressor protein, putative                                      |                     |                         |                       |                           |
| SACOL0437 | RpsF  | ribosomal protein S6                                                            |                     |                         |                       |                           |
| SACOL0439 | RpsR  | ribosomal protein S18                                                           |                     |                         |                       |                           |
| SACOL0458 | Xpt   | xanthine phosphoribosyltransferase                                              |                     |                         |                       |                           |
| SACOL0461 | GuaA  | GMP synthase                                                                    |                     |                         |                       |                           |
| SACOL0514 | GltB  | glutamate synthase, large subunit                                               |                     |                         |                       |                           |
| SACOL0584 | RplA  | ribosomal protein L1                                                            |                     |                         |                       |                           |
| SACOL0585 | RplJ  | ribosomal protein L10                                                           |                     |                         |                       |                           |
| SACOL0586 | RplL  | ribosomal protein L7/L12                                                        |                     |                         |                       |                           |
| SACOL0591 | RpsL  | ribosomal protein S12                                                           |                     |                         |                       |                           |
| SACOL0592 | RpsG  | ribosomal protein S7                                                            |                     |                         |                       |                           |
| SACOL0672 | SarA  | staphylococcal accessory regulator A                                            |                     |                         |                       |                           |
| SACOL0746 | MgrA  | HTH-type transcriptional regulator mgrA                                         |                     |                         |                       |                           |
| SACOL0792 | NrdE  | ribonucleoside-diphosphate reductase, alpha subunit                             |                     |                         |                       |                           |
| SACOL0793 | NrdF  | ribonucleoside-diphosphate reductase 2, beta subunit                            |                     |                         |                       |                           |
| SACOL0839 | Pgk   | Phosphoglycerate kinase                                                         |                     |                         |                       |                           |
| SACOL0840 | TpiA  | triosephosphate isomerase                                                       |                     |                         |                       |                           |
| SACOL0841 | Pgm   | phosphoglycerate mutase, 2,3-bisphosphoglycerate-independent                    |                     |                         |                       |                           |
| SACOL0842 | Eno   | Enolase                                                                         |                     |                         |                       |                           |
| SACOL0915 | SufD  | FeS assembly protein SufD                                                       |                     |                         |                       |                           |
| SACOL0918 | SufB  | FeS assembly protein SufB                                                       |                     |                         |                       |                           |
| SACOL0937 | DltC  | D-alanyl carrier protein                                                        |                     |                         |                       |                           |
| SACOL1077 | PurQ  | phosphoribosylformylglycinamide synthase I                                      |                     |                         |                       |                           |
| SACOL1090 | -     | conserved hypothetical protein                                                  |                     |                         |                       |                           |
| SACOL1102 | PdhA  | pyruvate dehydrogenase complex E1 component, alpha subunit                      |                     |                         |                       |                           |
| SACOL1103 | PdhB  | pyruvate dehydrogenase complex E1 component, beta subunit                       |                     |                         |                       |                           |
| SACOL1104 | PdhC  | pyruvate dehydrogenase complex E2 component, dihydrolipoamide acetyltransferase |                     |                         |                       |                           |
| SACOL1105 | PdhD  | pyruvate dehydrogenase complex E3 component, lipoamide dehydrogenase            |                     |                         |                       |                           |
| SACOL1293 | Pnp   | polyribonucleotide nucleotidyltransferase                                       |                     |                         |                       |                           |
| SACOL1536 | RluB  | Pseudouridine synthase                                                          |                     |                         |                       |                           |
| SACOL1558 | -     | conserved hypothetical protein                                                  |                     |                         |                       |                           |
| SACOL1618 | RpoD  | RNA polymerase sigma factor rpoD                                                |                     |                         |                       |                           |
| SACOL1676 | TrmU  | tRNA (5-methylaminomethyl-2-thiouridylyl)-methyltransferase                     |                     |                         |                       |                           |
| SACOL1769 | RpsD  | ribosomal protein S4                                                            |                     |                         |                       |                           |
| SACOL1778 | TyrS  | Tyrosyl-tRNA synthetase                                                         |                     |                         |                       |                           |
| SACOL1960 | GatB  | Aspartyl/glutamyl-tRNA(Asn/Gln) amidotransferase subunit B                      |                     |                         |                       |                           |
| SACOL2042 | IlvD  | dihydroxy-acid dehydratase                                                      |                     |                         |                       |                           |
| SACOL2043 | IlvB  | acetolactate synthase, large subunit, biosynthetic type                         |                     |                         |                       |                           |
| SACOL2045 | IlvC  | ketol-acid reductoisomerase                                                     |                     |                         |                       |                           |
| SACOL2046 | LeuA  | 2-isopropylmalate synthase                                                      |                     |                         |                       |                           |
| SACOL2047 | LeuB  | 3-isopropylmalate dehydrogenase                                                 |                     |                         |                       |                           |
| SACOL2048 | LeuC  | 3-isopropylmalate dehydratase, large subunit                                    |                     |                         |                       |                           |
| SACOL2049 | LeuD  | 3-isopropylmalate dehydratase, small subunit                                    |                     |                         |                       |                           |
| SACOL2050 | IlvA2 | threonine dehydratase                                                           |                     |                         |                       |                           |
| SACOL2060 | Air   | Alanine racemase 1                                                              |                     |                         |                       |                           |
| SACOL2099 | AtpF  | ATP synthase F0, B subunit                                                      |                     |                         |                       |                           |
| SACOL2212 | RplQ  | 50S ribosomal protein L17                                                       |                     |                         |                       |                           |
| SACOL2214 | RpsK  | 30S ribosomal protein S11                                                       |                     |                         |                       |                           |
| SACOL2240 | RpsJ  | 30S ribosomal protein S10                                                       |                     |                         |                       |                           |
| SACOL2285 | UreG  | Urease accessory protein UreG                                                   |                     |                         |                       |                           |
| SACOL2287 | SarR  | HTH-type transcriptional regulator sarR                                         |                     |                         |                       |                           |
| SACOL2384 | SarZ  | HTH-type transcriptional regulator sarZ                                         |                     |                         |                       |                           |

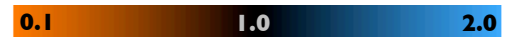

Figure S3

**Figure S3:**

A detailed heatmap is presented for selected degradation candidates including their degradation kinetics in the soluble and non-soluble fraction of wild type and *clpP* mutant cells ( $^{13}\text{C}/^{15}\text{N}$  – values corrected against isotopic protein dilution due to growth and normalized against the initial  $^{13}\text{C}/^{15}\text{N}$ -value for each fraction).
