# Supplementary material
Source: PubMed Central journal article supplement (PMC3434780)
Supplement: supp_M112.017004_FigS4.pdf [file supp_M112.017004_FigS4.pdf]

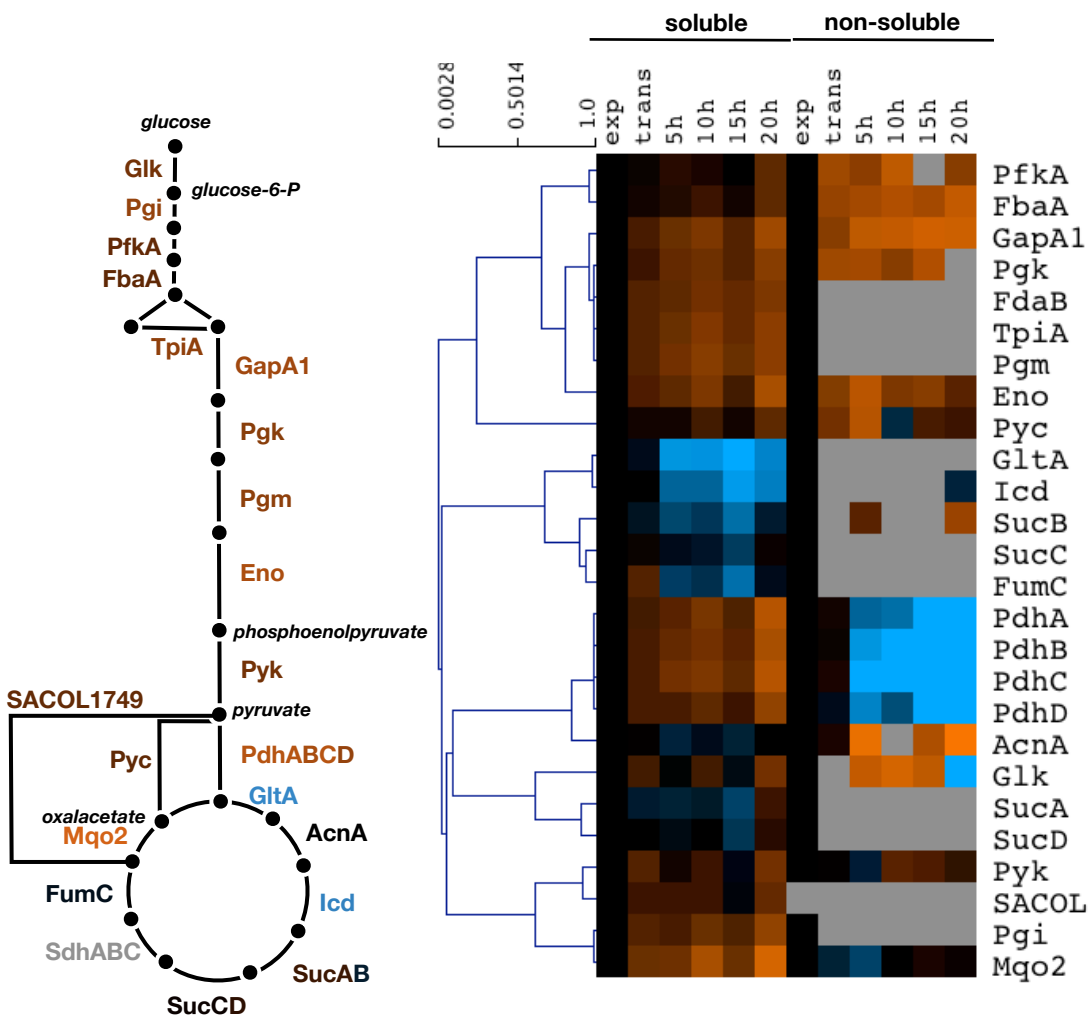

Figure S4A

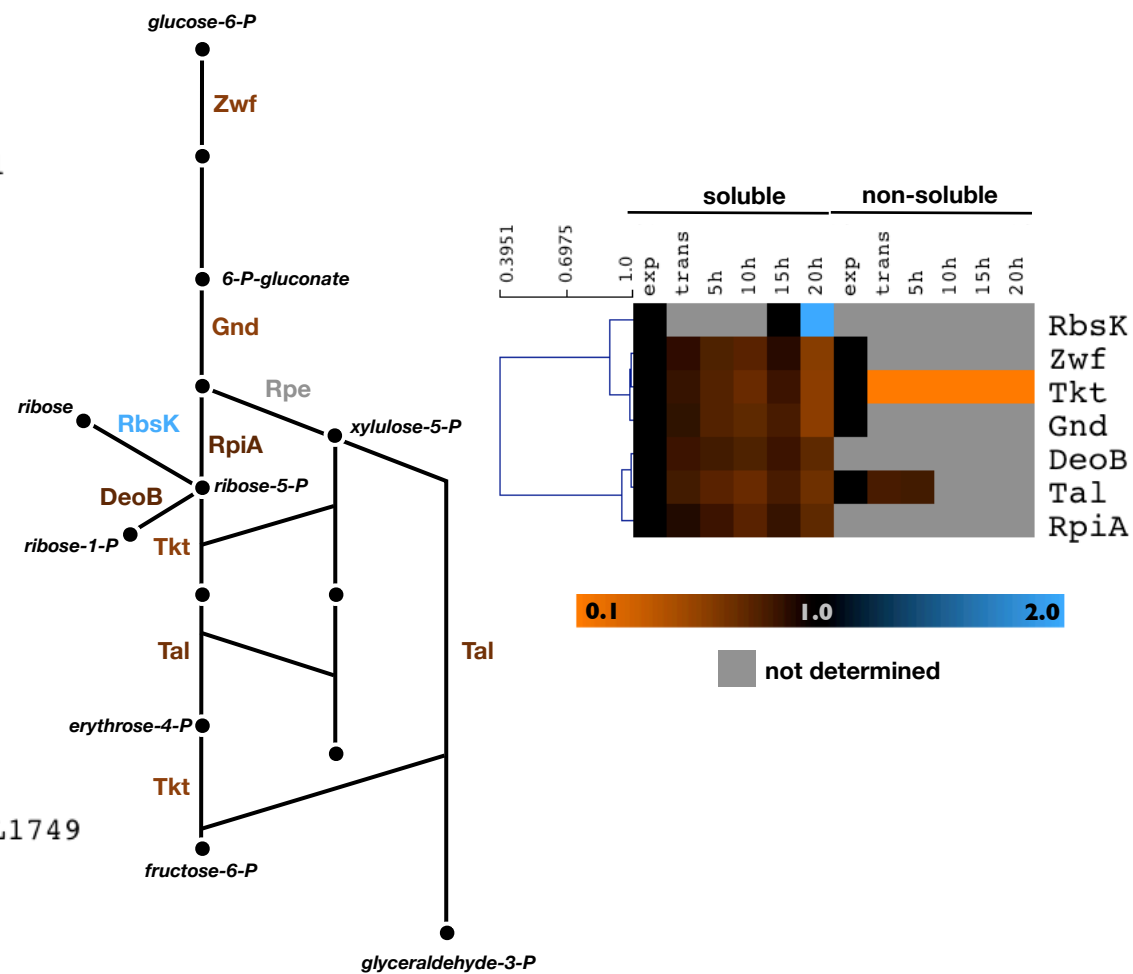

Figure S4B

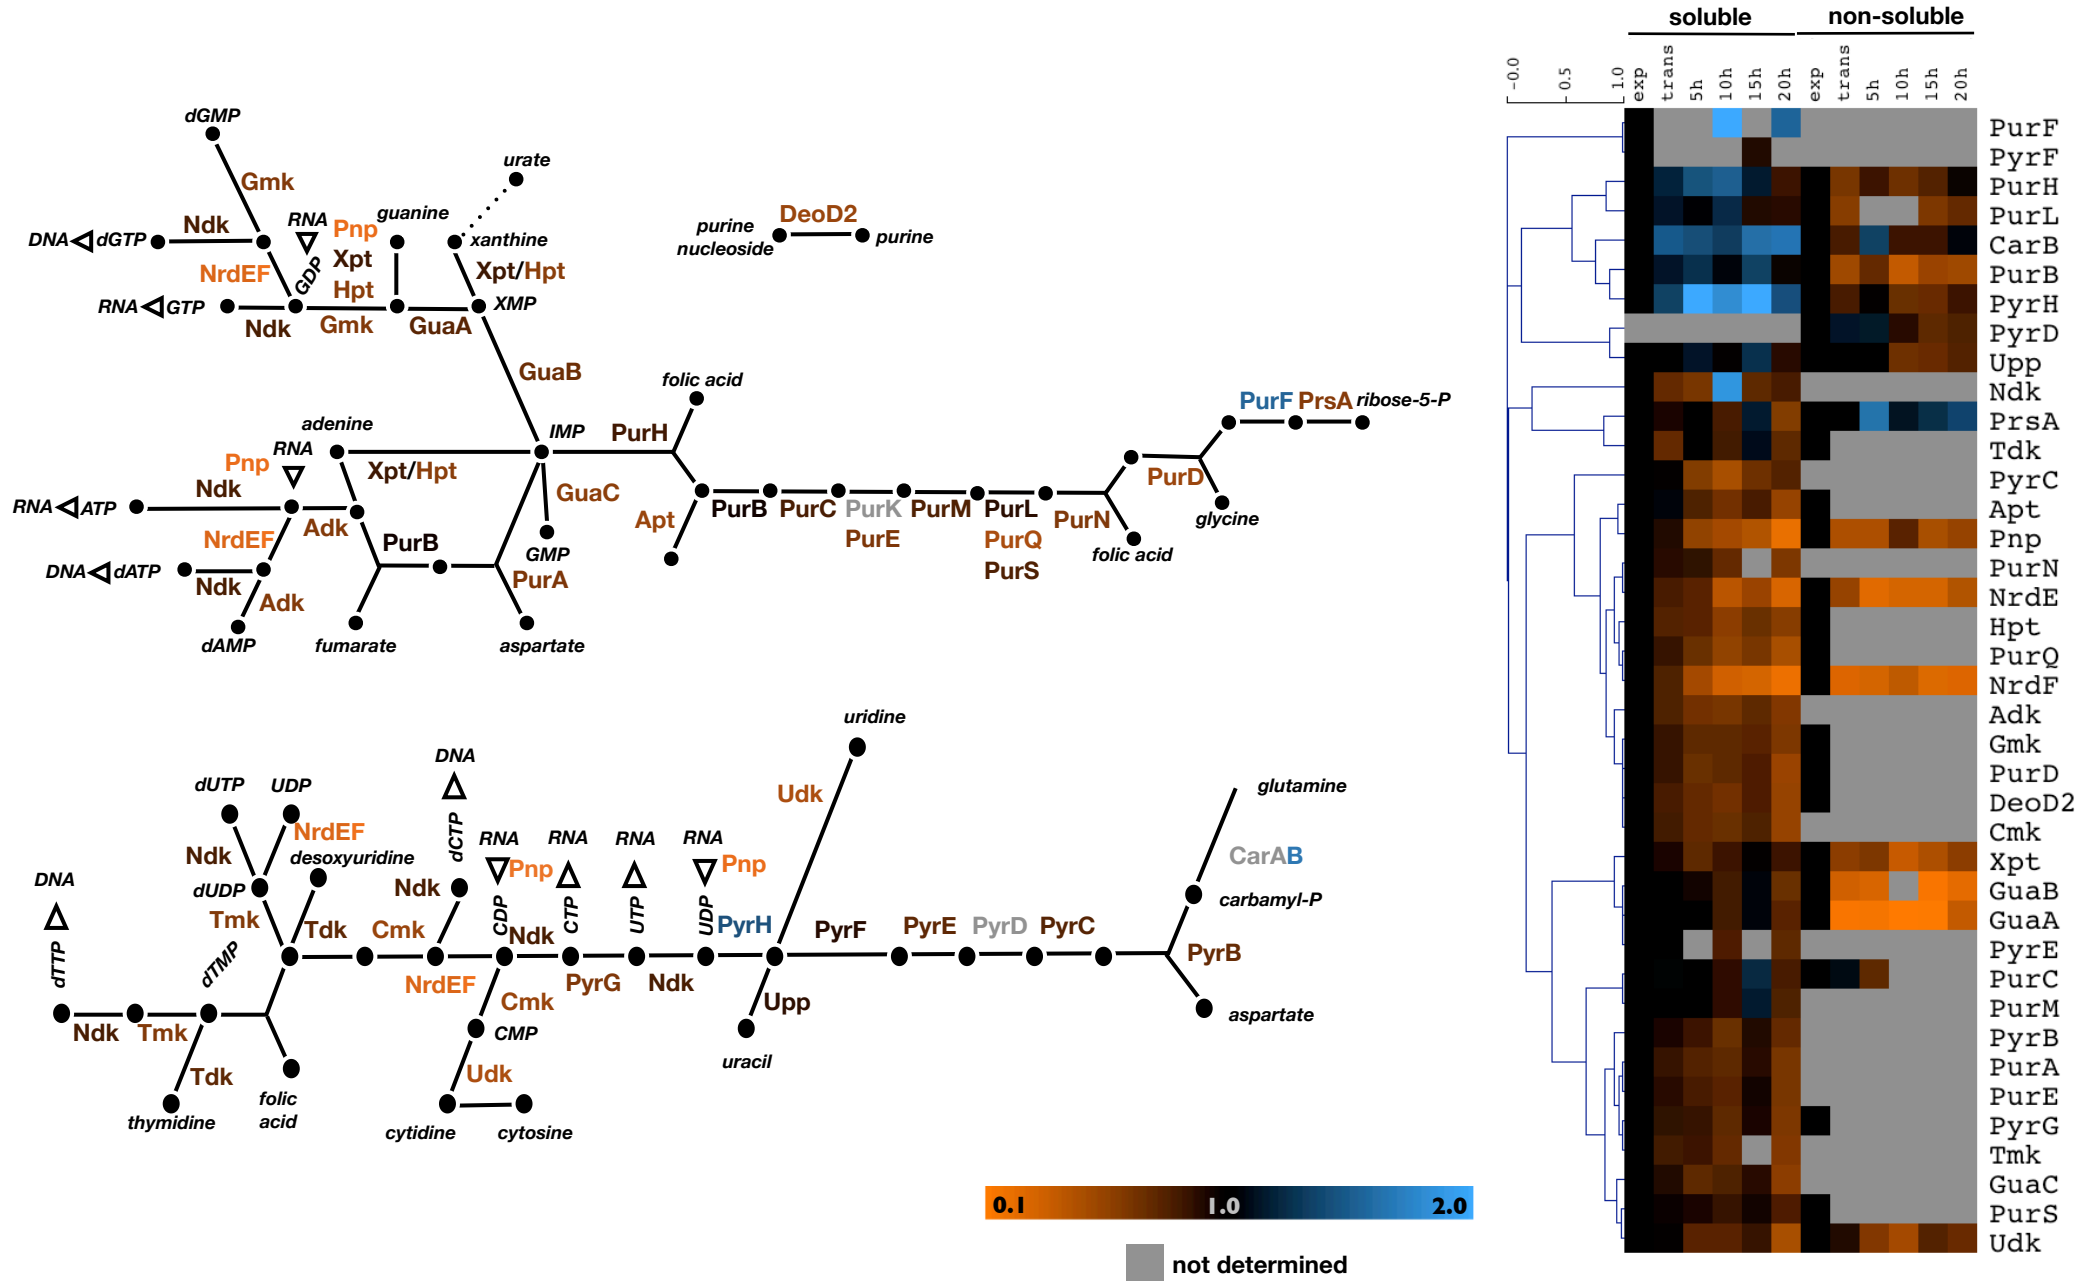

Figure S4C

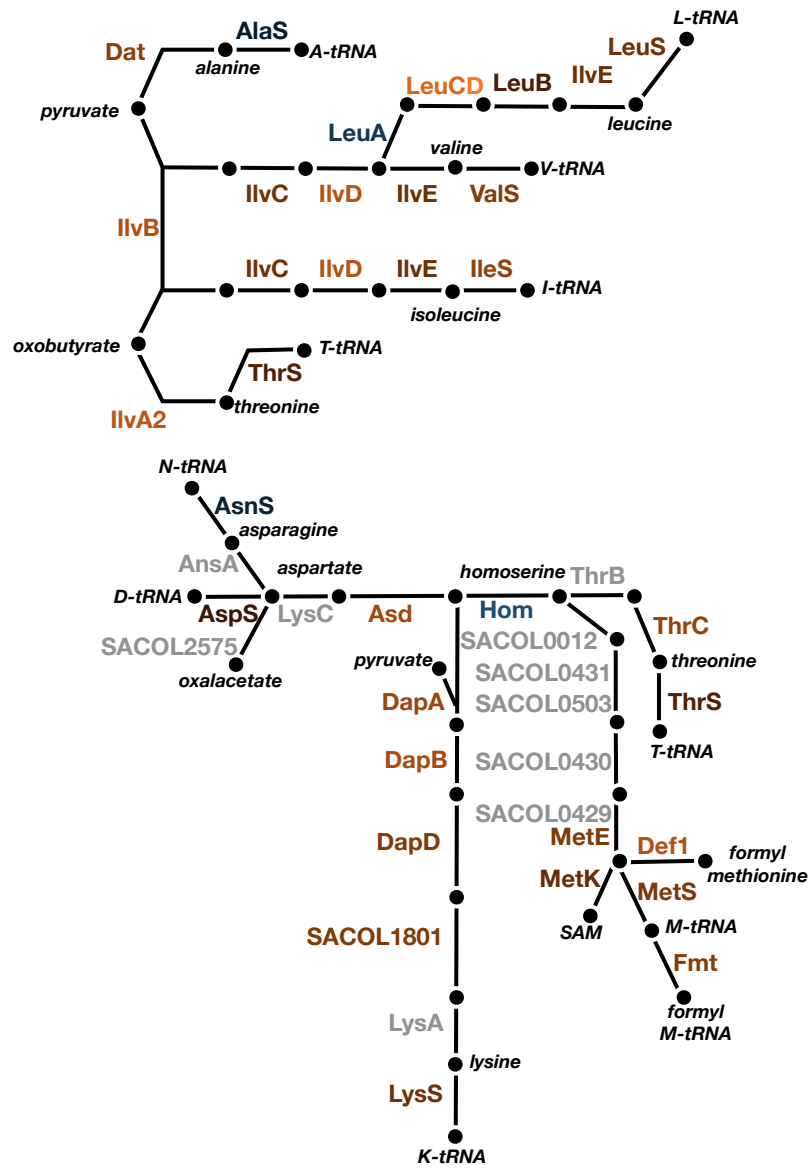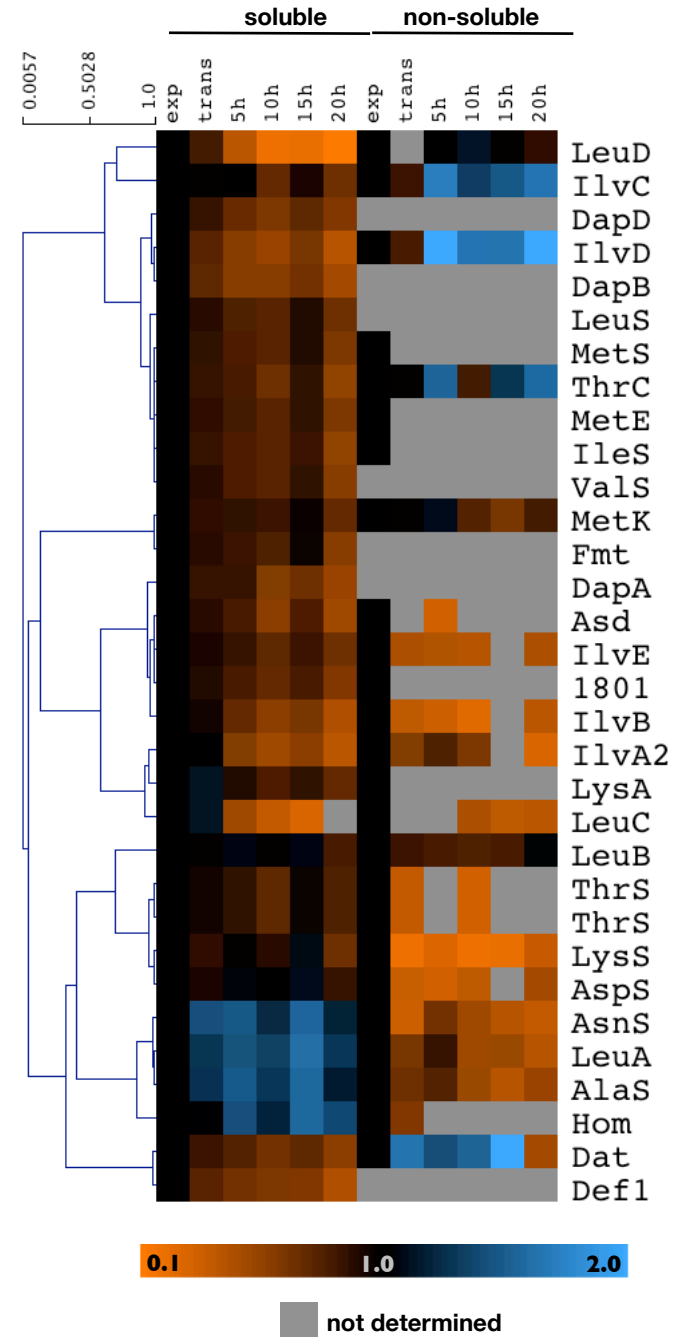

Figure S4D



### Figure S4:

Degradation kinetics of selected proteins assigned to specific metabolic pathways are depicted for the soluble and non-soluble fraction of the wild type (normalized  $^{13}\text{C}$ -values;  $^{13}\text{C}/^{15}\text{N}$  – values corrected against isotopic protein dilution due to growth and normalized against the initial  $^{13}\text{C}/^{15}\text{N}$ -value for each fraction).

A) glycolysis and TCA cycle; B) pentose phosphate pathway; C) purine and pyrimidine pathway; D) amino acid biosynthesis (L, V, I, T, A, N, D, K, M and T); E) amino acid biosynthesis (Y, F, W, H, G, C, E, Q, P and R).

The enzyme names in the pathway are colored with the last detected value-coded color of the soluble fraction.
