# Supplementary material
Source: PubMed Central journal article supplement (PMC3434780)
Supplement: supp_M112.017004_FigS5.pdf [file supp_M112.017004_FigS5.pdf]

**Figure S5:**

Kinetic data are depicted for selected TCA cycle enzymes for the soluble fraction (% remaining:  $^{13}\text{C}/^{15}\text{N}$  – values corrected against isotopic protein dilution due to growth and normalized against the initial  $^{13}\text{C}/^{15}\text{N}$ -value; [solid: wild type; dashed: *clpP* mutant]) and synthesis level in the stationary phase. The data ( $^{12}\text{C}/^{15}\text{N}$ ) were normalized to the transient sample time-point [light blue: wild type; dark blue: *clpP* mutant]).
