# Supplementary material
Source: PubMed Central journal article supplement (PMC3434780)
Supplement: supp_M112.017004_FigS6.pdf [file supp_M112.017004_FigS6.pdf]

# *S.aureus* strains in CDM

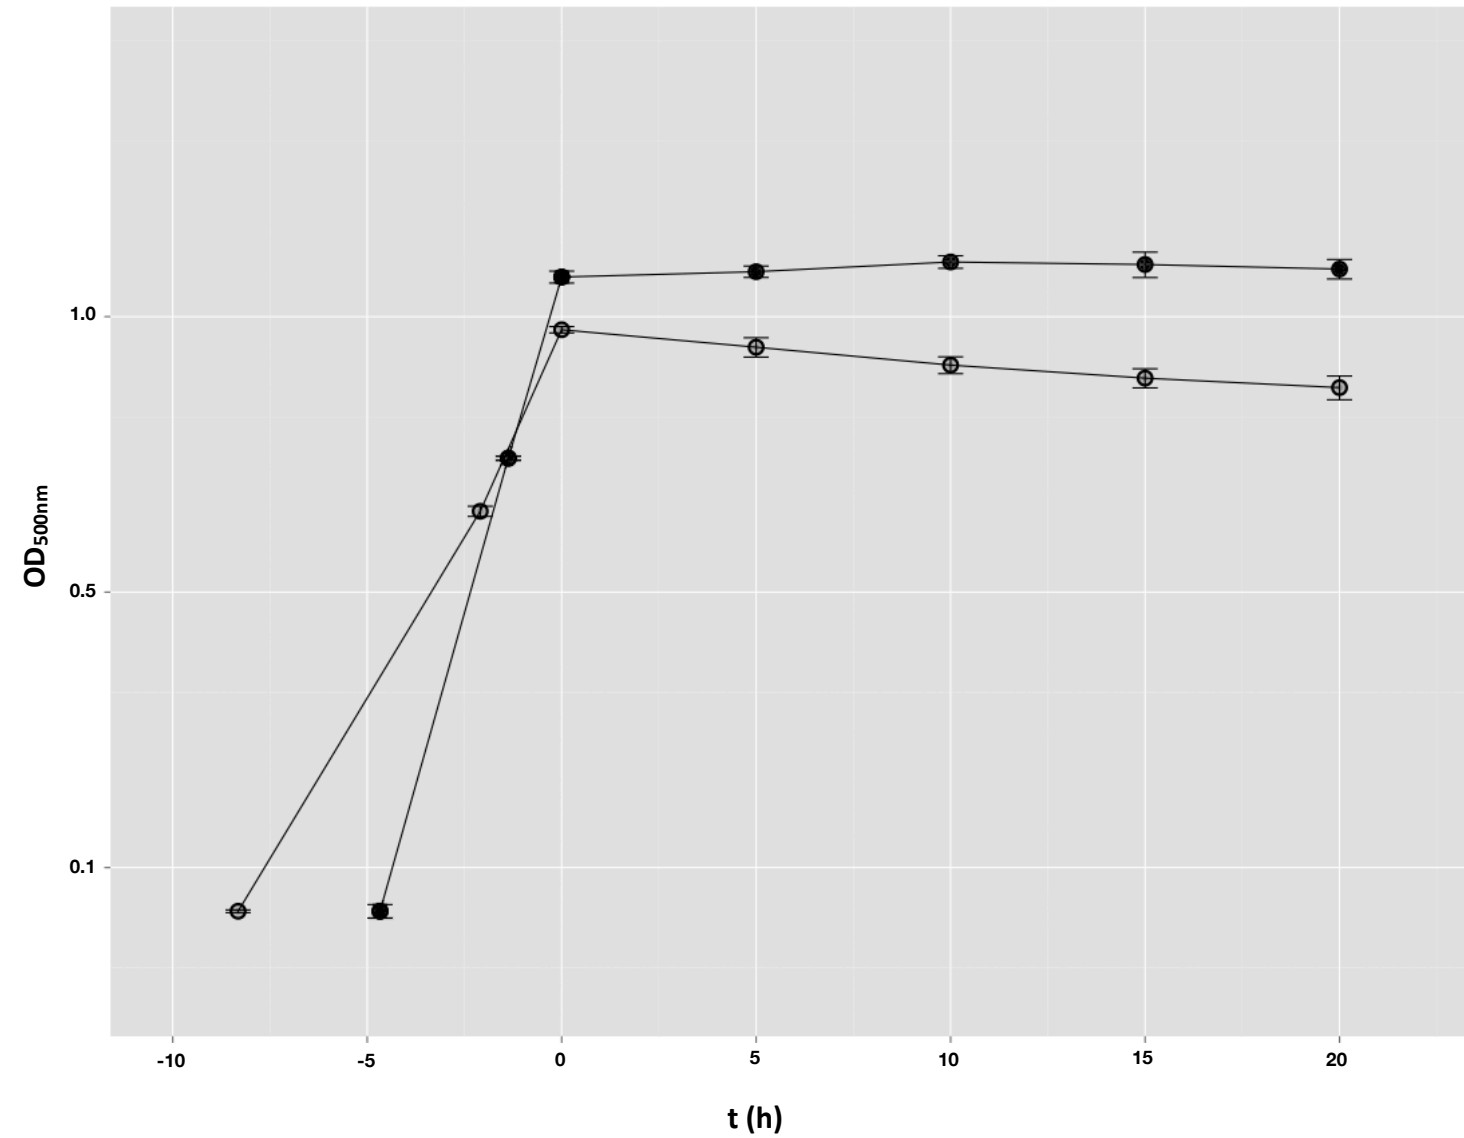

## TSB plate

wild type  $\Delta clpP$

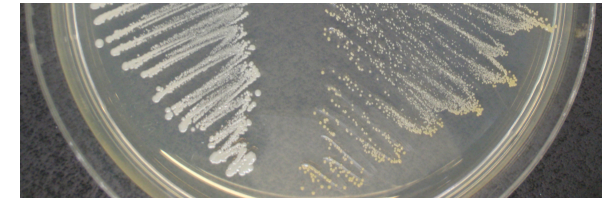

## cell wall (TEM)

wild type  $\Delta clpP$

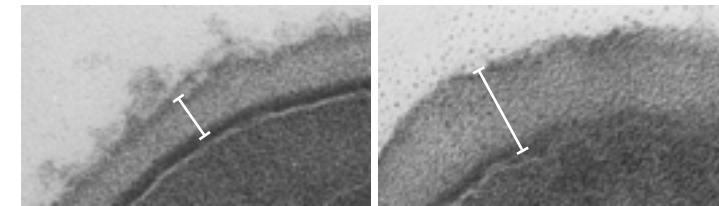

36.7 nm  $\pm$  4.94

60.4 nm  $\pm$  4.11

## Western blot

wild type  $\Delta clpP$   
log stat log stat

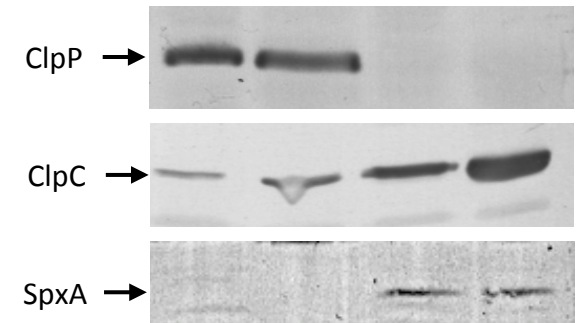

Figure S6

**Figure S6:**

Growth curves are shown for the wild type (closed circles) and *clpP* mutant (open circles). The cells were grown at 37°C in a chemically defined medium. As a phenotypical difference, a stronger pigmentation and a thicker cell wall could be observed the *clpP* mutant. As expected the deletion of *clpP* leads to the induction of ClpC and stabilization of SpxA.
