# Supplementary material
Source: PubMed Central journal article supplement (PMC3434780)
Supplement: supp_M112.017004_FigS7.pdf [file supp_M112.017004_FigS7.pdf]

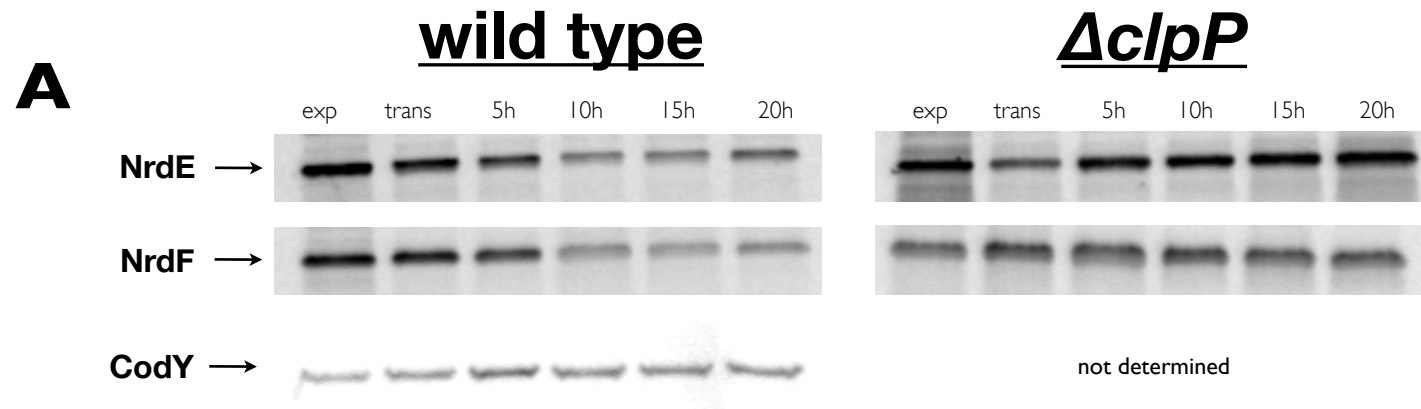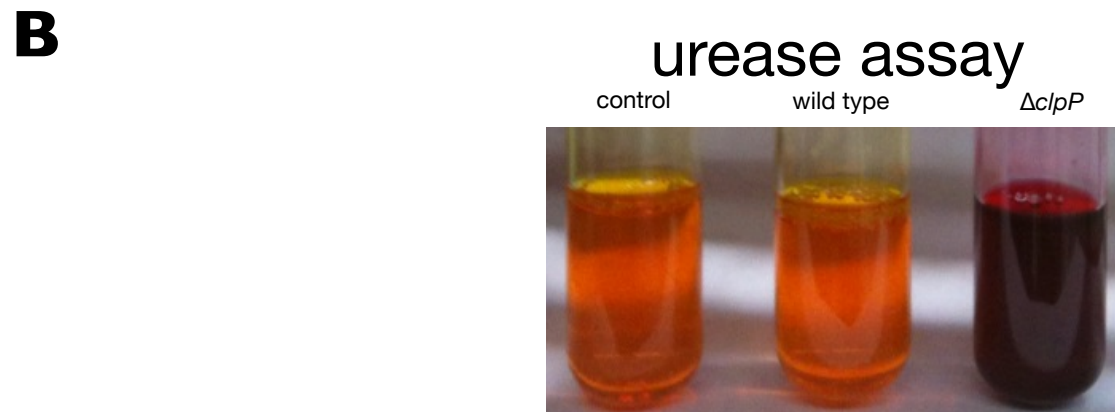

Figure S7

**Figure S7:**

A) The stability of NrdE, NrdF and CodY was determined by <sup>35</sup>S-methionine pulse-chase labeling and immunoprecipitation with specific antibodies during glucose starvation. (B) As previously shown<sup>2</sup> the *clpP* mutant exhibits a stronger urease activity.
