# Supplementary material
Source: PubMed Central journal article supplement (PMC3434780)
Supplement: supp_M112.017004_FigS8.pdf [file supp_M112.017004_FigS8.pdf]

## ClpC

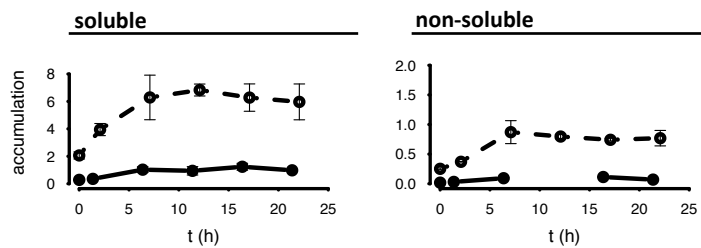

## ClpB

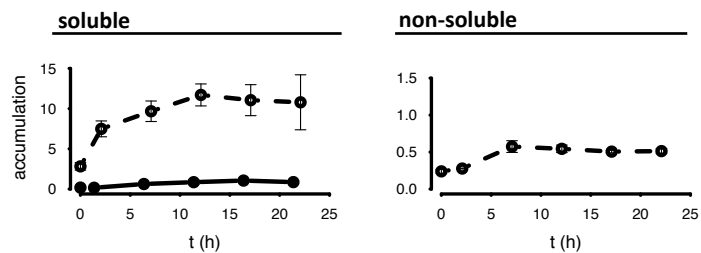

## GroEL

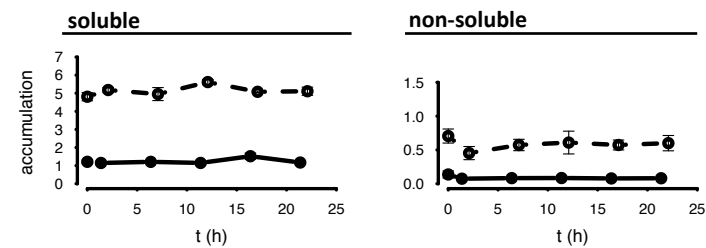

## DnaK

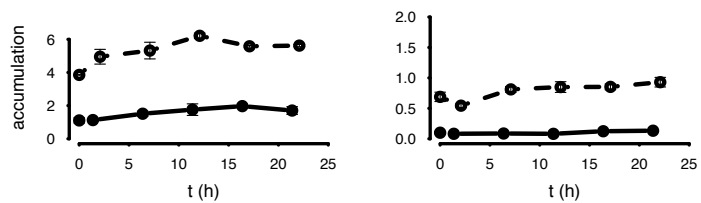

## DnaJ

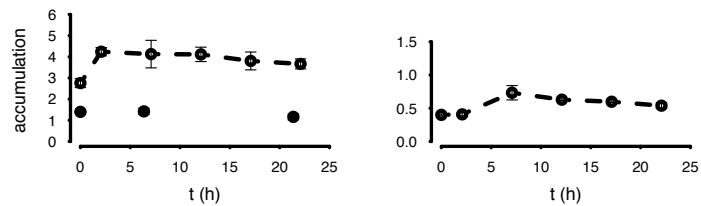

## GrpE

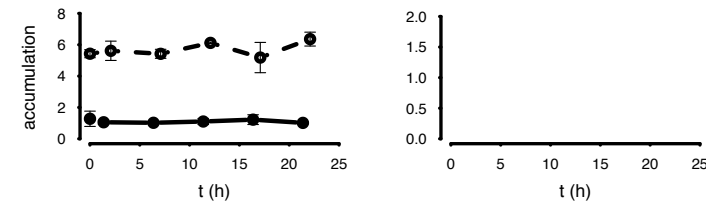

Figure S8

**Figure S8:**

Depicted is the accumulation level ( $^{13}\text{C}/^{15}\text{N} + ^{12}\text{C}/^{15}\text{N}$ ) of selected chaperone proteins in the soluble and non-soluble fraction in the wild type (solid line) and the *clpP* mutant (dashed line). GrpE was not found in the non-soluble fraction.
