# Supplementary material
Source: PubMed Central journal article supplement (PMC3434780)
Supplement: supp_M112.017004_FigS9.pdf [file supp_M112.017004_FigS9.pdf]

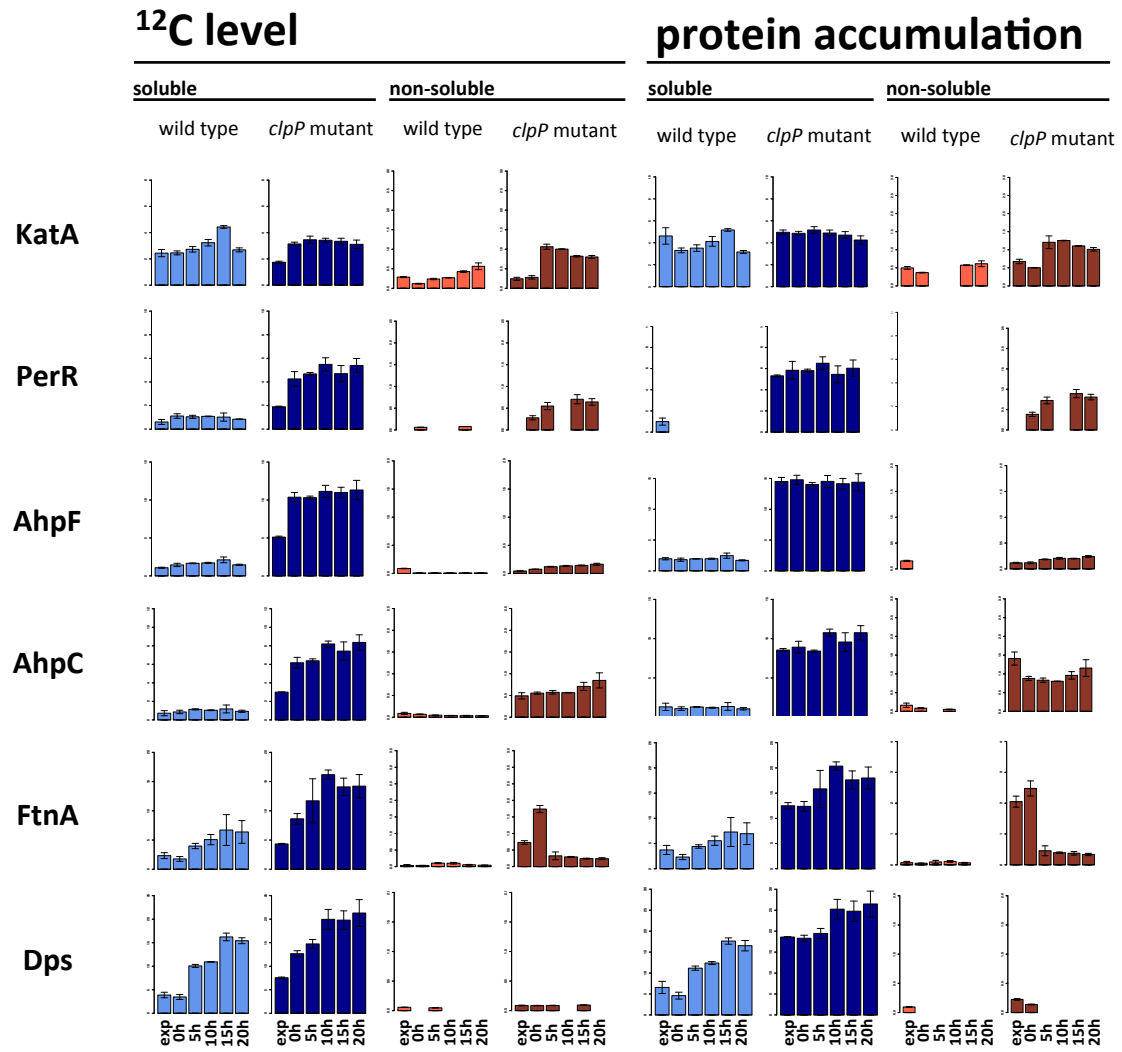

Figure S9

**Figure S9:**

Selected members of the PerR-regulon are displayed on protein accumulation ( $^{13}\text{C}/^{15}\text{N} + ^{12}\text{C}/^{15}\text{N}$ ) and  $^{12}\text{C}$ -protein level in the wild type and *clpP* mutant in the soluble and non-soluble fraction.
