# Supplementary material
Source: PubMed Central journal article supplement (PMC3434780)
Supplement: supp_M112.017004_FigS10.pdf [file supp_M112.017004_FigS10.pdf]

# SarA

# SarS

# SrrA

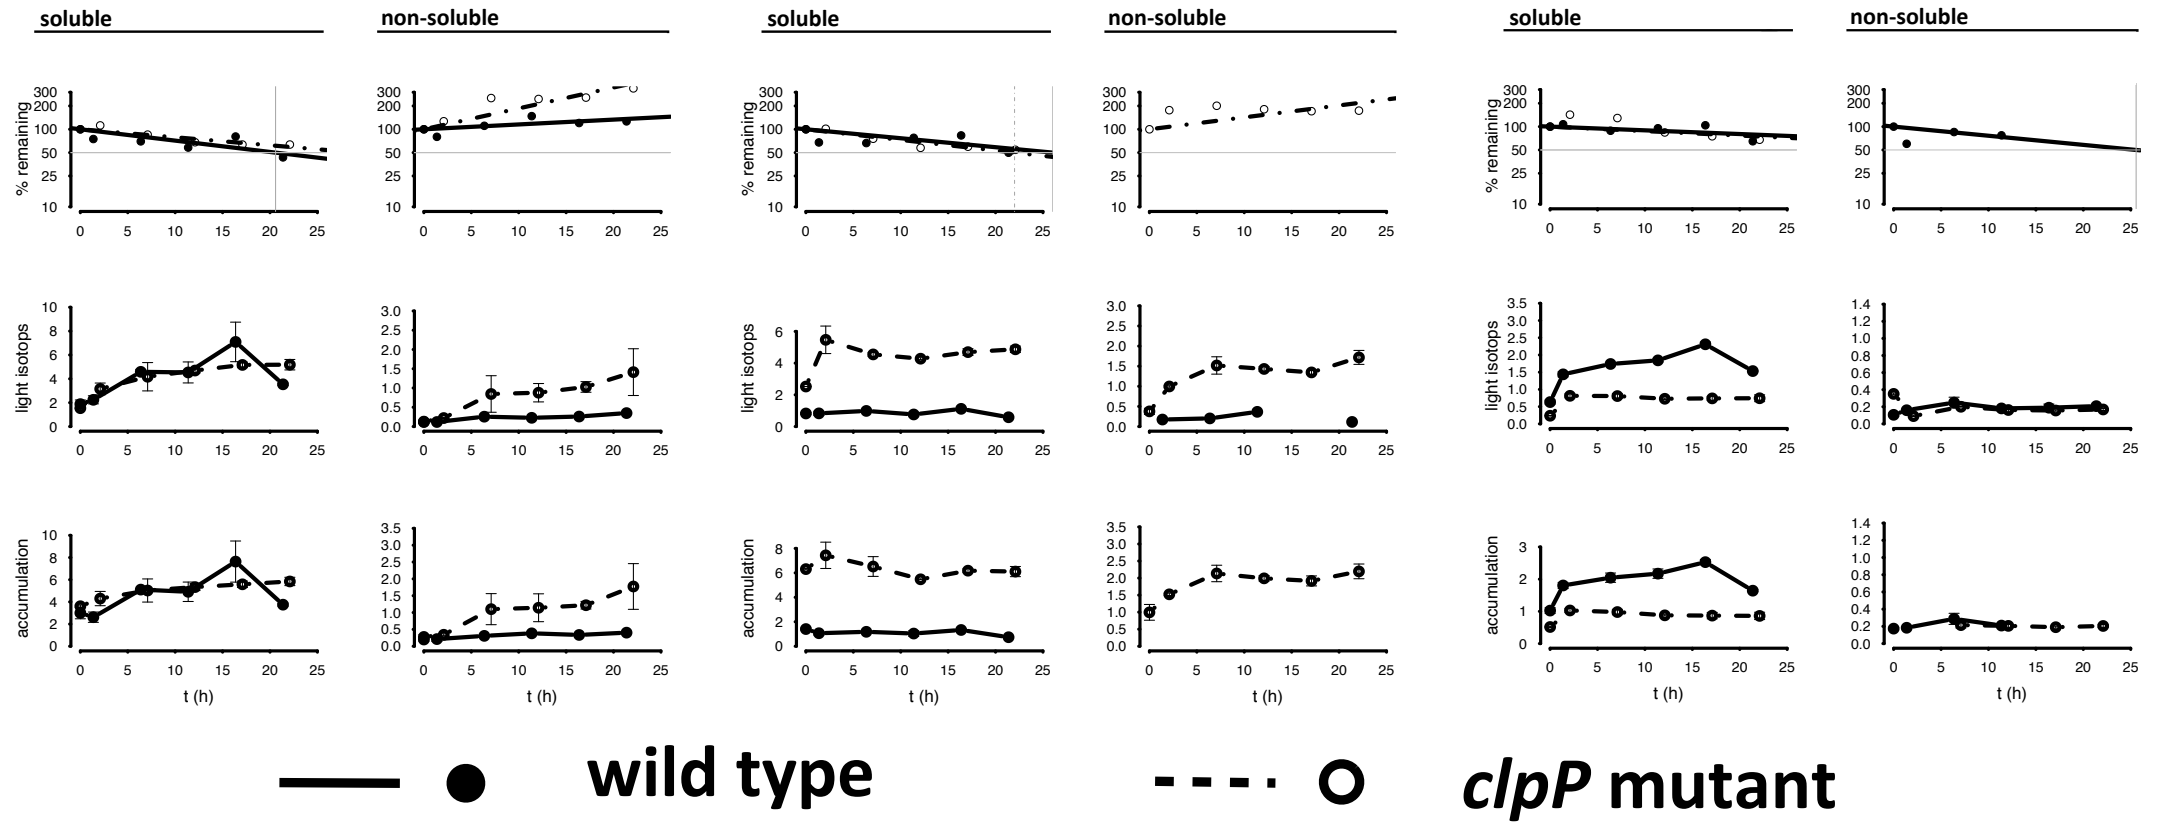

Figure S10

**Figure S10:**

The degradation ( % remaining:  $^{13}\text{C}$ -protein values normalized against exp. growth phase and cell number), synthesis (light isotopes,  $^{12}\text{C}/^{15}\text{N}$  ) and protein accumulation ( $^{13}\text{C}/^{15}\text{N} + ^{12}\text{C}/^{15}\text{N}$ ) is displayed for selected pathogenicity factors in the wild type and the *clpP* mutant in the soluble and non-soluble fraction.
