# Supplementary material
Source: PubMed Central journal article supplement (PMC3434780)
Supplement: supp_M112.017004_FigS11.pdf [file supp_M112.017004_FigS11.pdf]

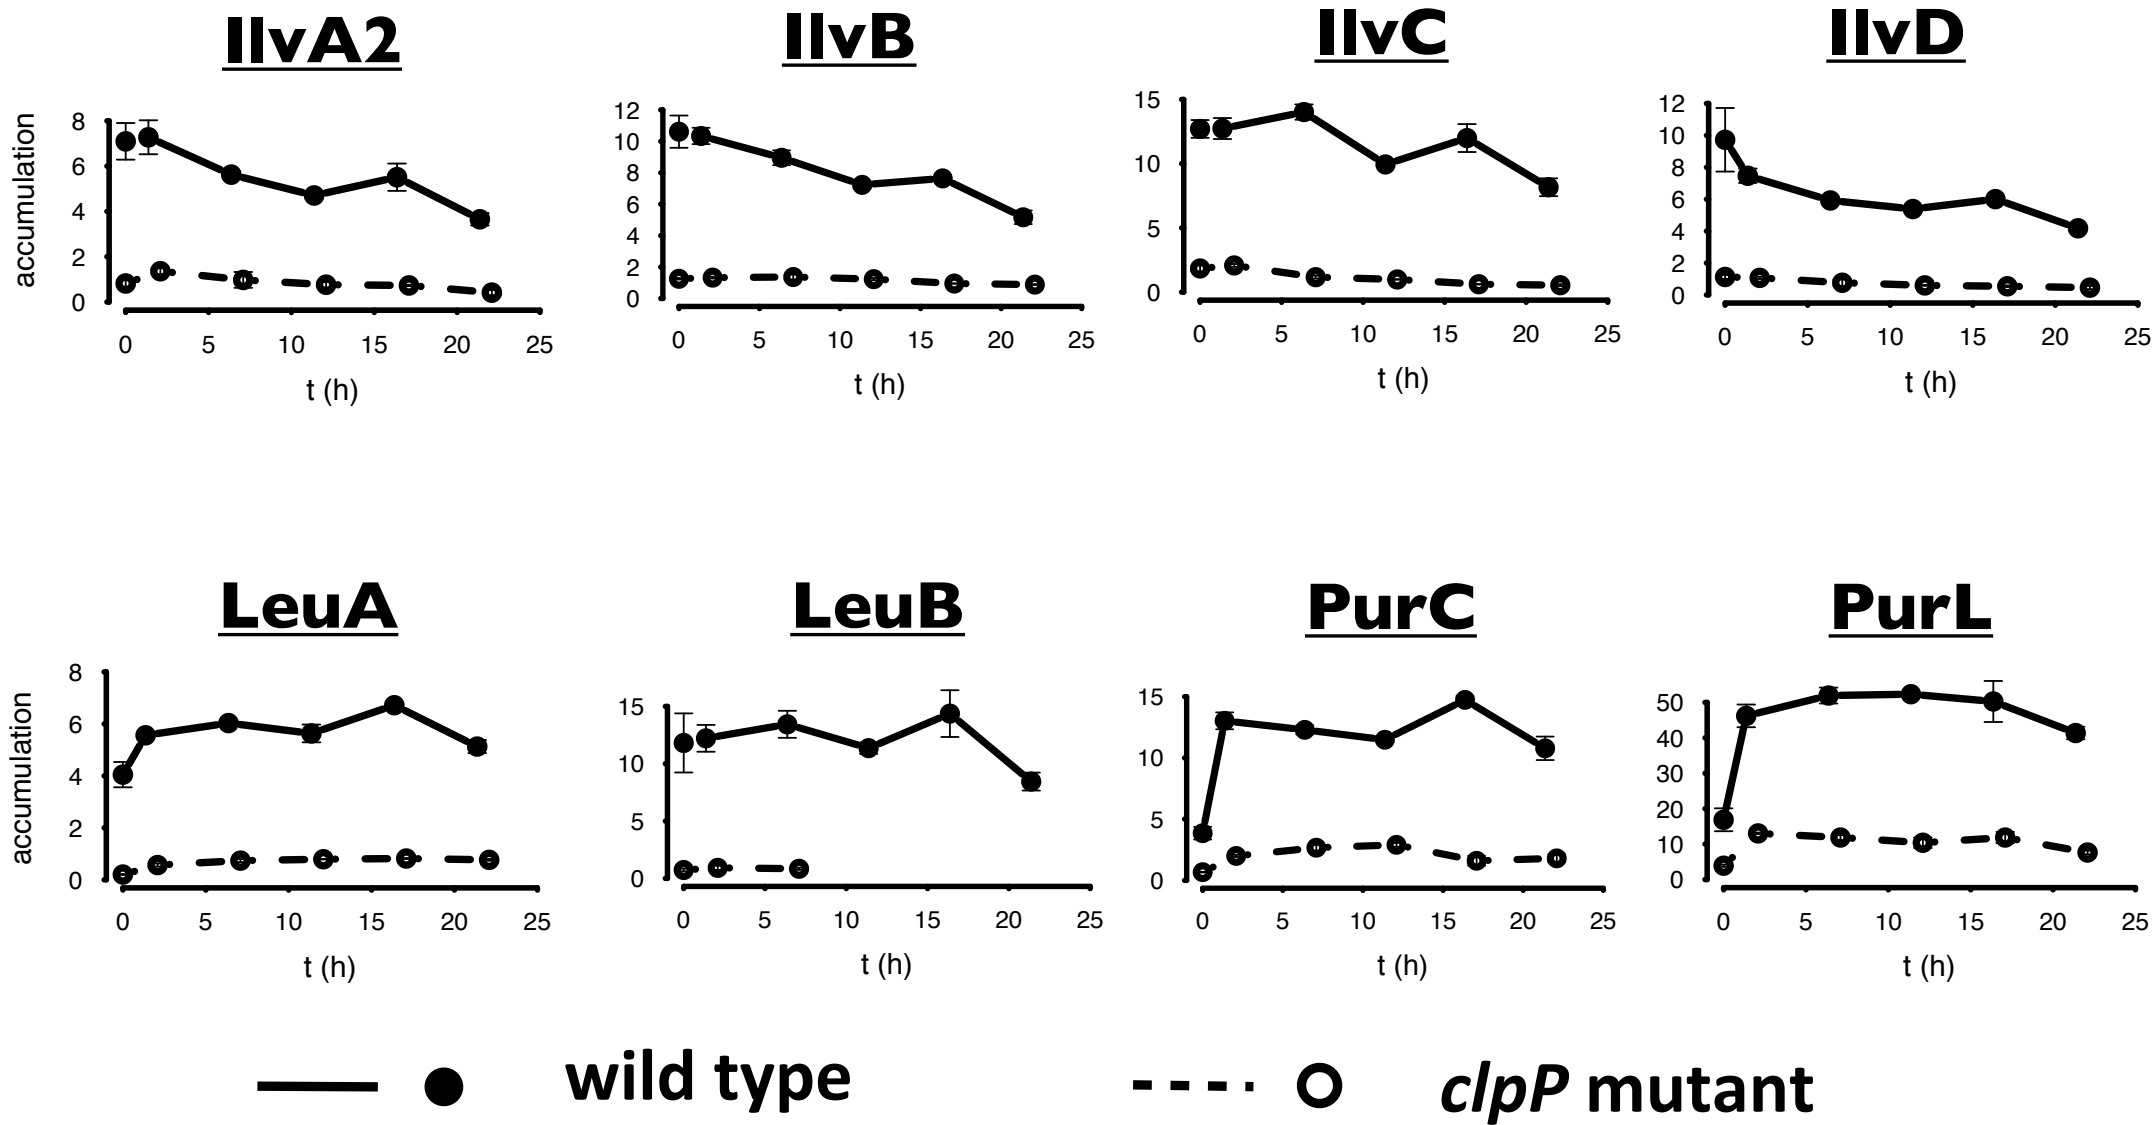

Figure S11

**Figure S11:**

Depicted is the accumulation level ( $^{13}\text{C}/^{15}\text{N} + ^{12}\text{C}/^{15}\text{N}$ ) of selected CodY-regulated proteins in the soluble fraction in the wild type (solid line) and the *clpP* mutant (dashed line).
