# Supplementary material
Source: PubMed Central journal article supplement (PMC3434780)
Supplement: supp_M112.017004_FigS12.pdf [file supp_M112.017004_FigS12.pdf]

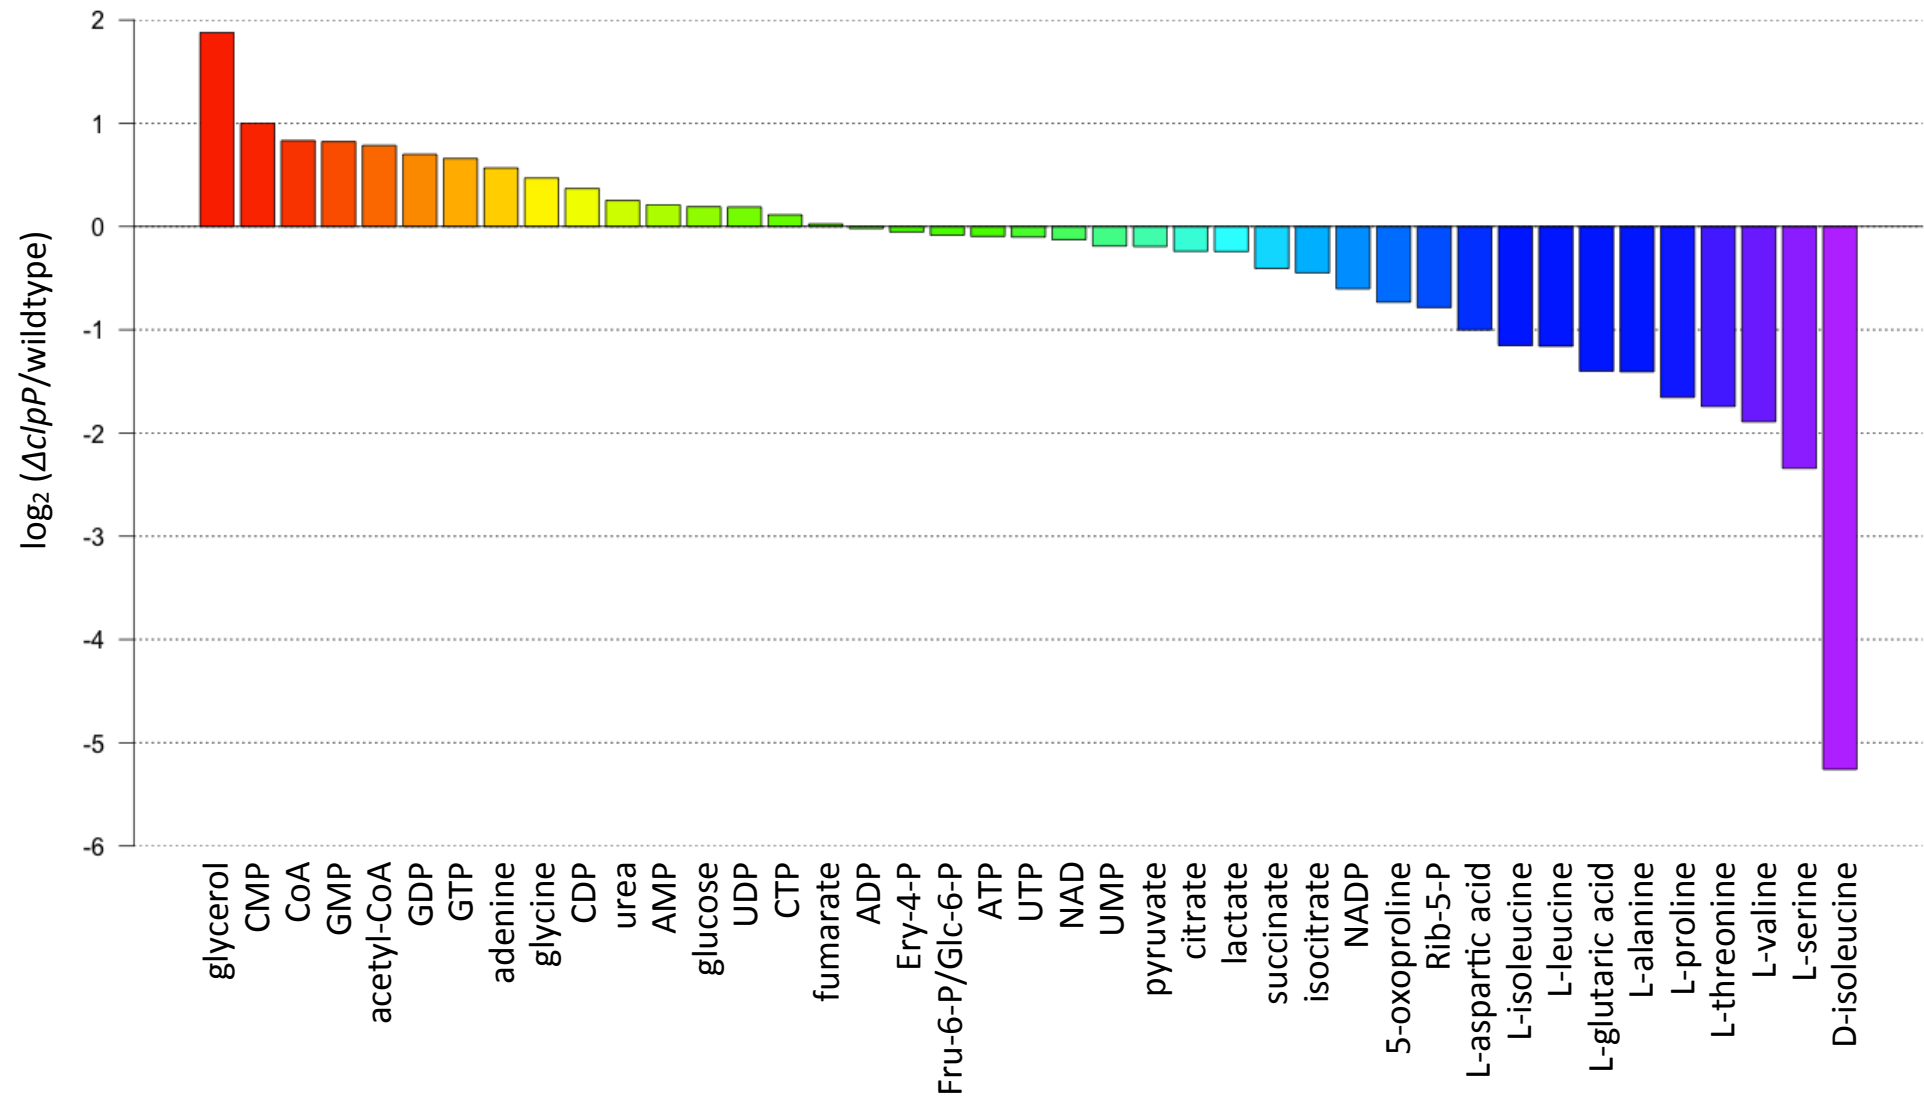

Figure S12A

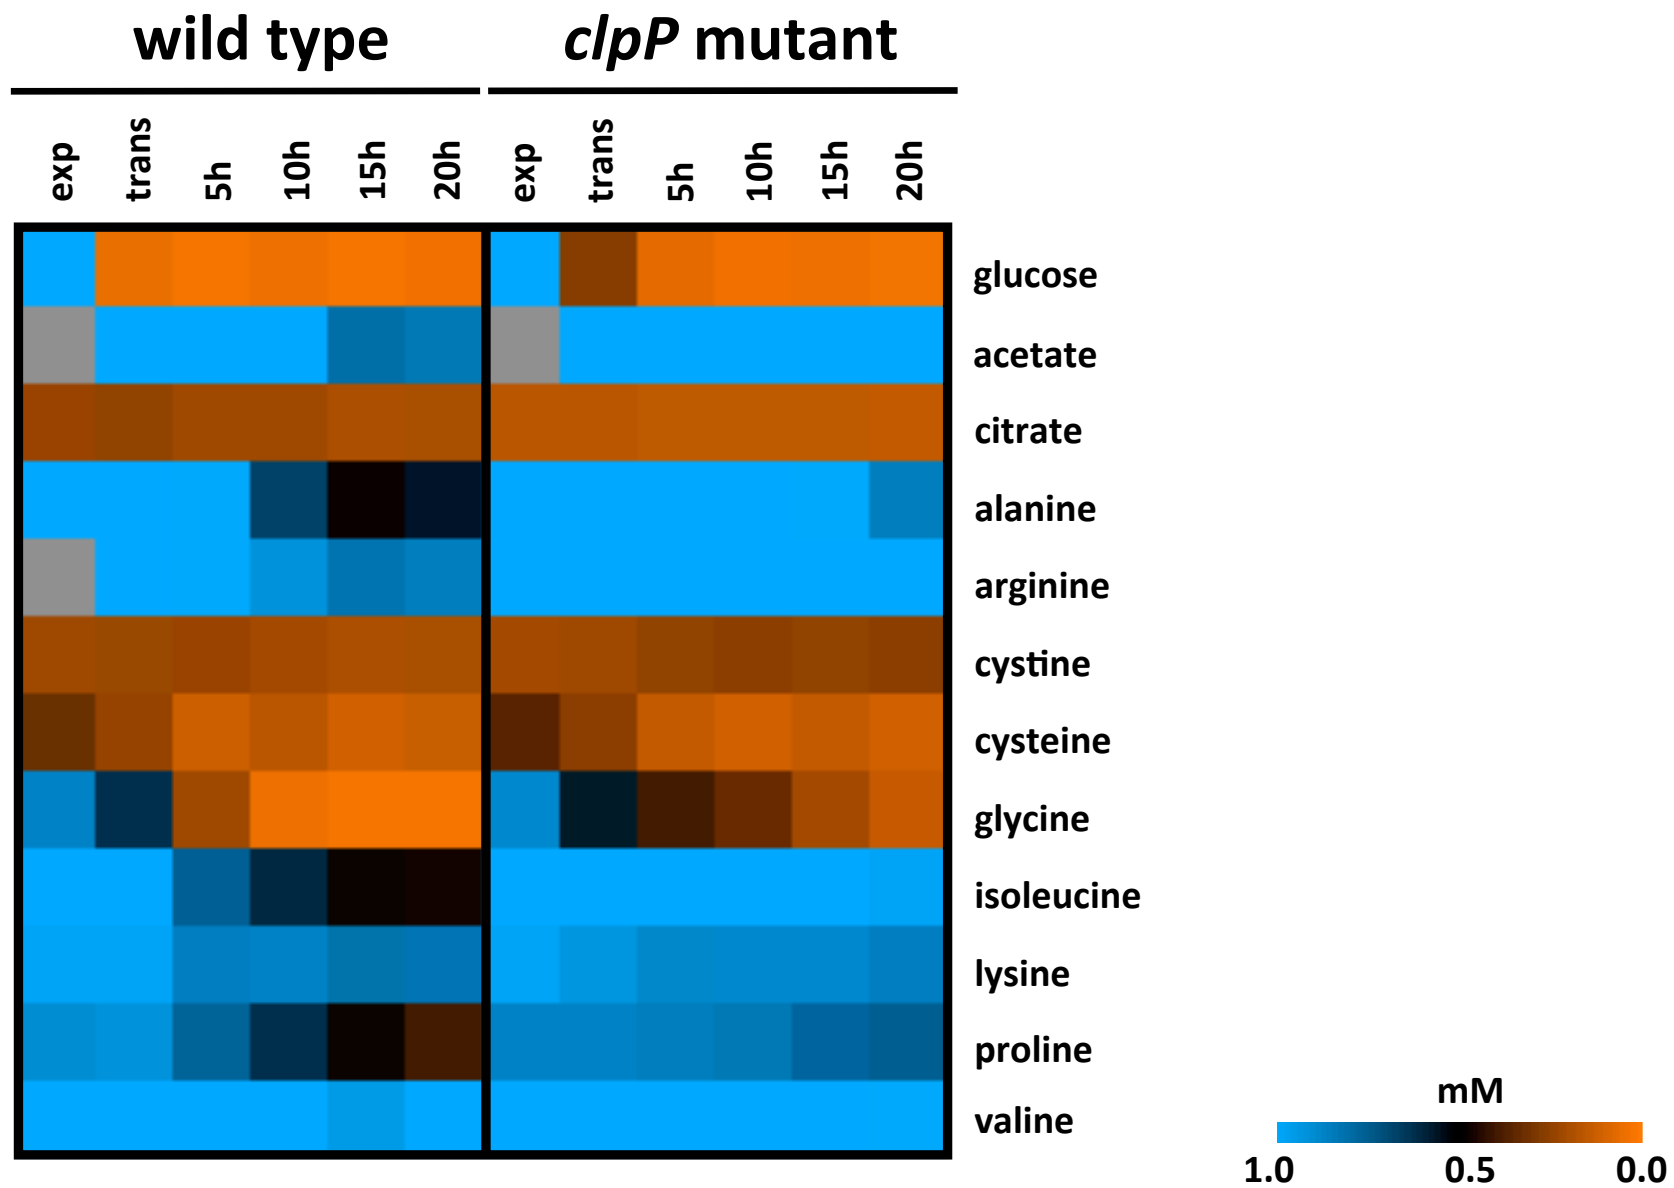

Figure S12B

**Figure S12:**

A) The ratios of selected intracellular metabolites from exponentially grown wild type and *clpP* mutant cells are displayed.

B) Depicted is the concentration of extracellular metabolites over the entire time course.
