# Supplementary material
Source: PubMed Central journal article supplement (PMC3434780)
Supplement: supp_M112.017004_FigS13.pdf [file supp_M112.017004_FigS13.pdf]

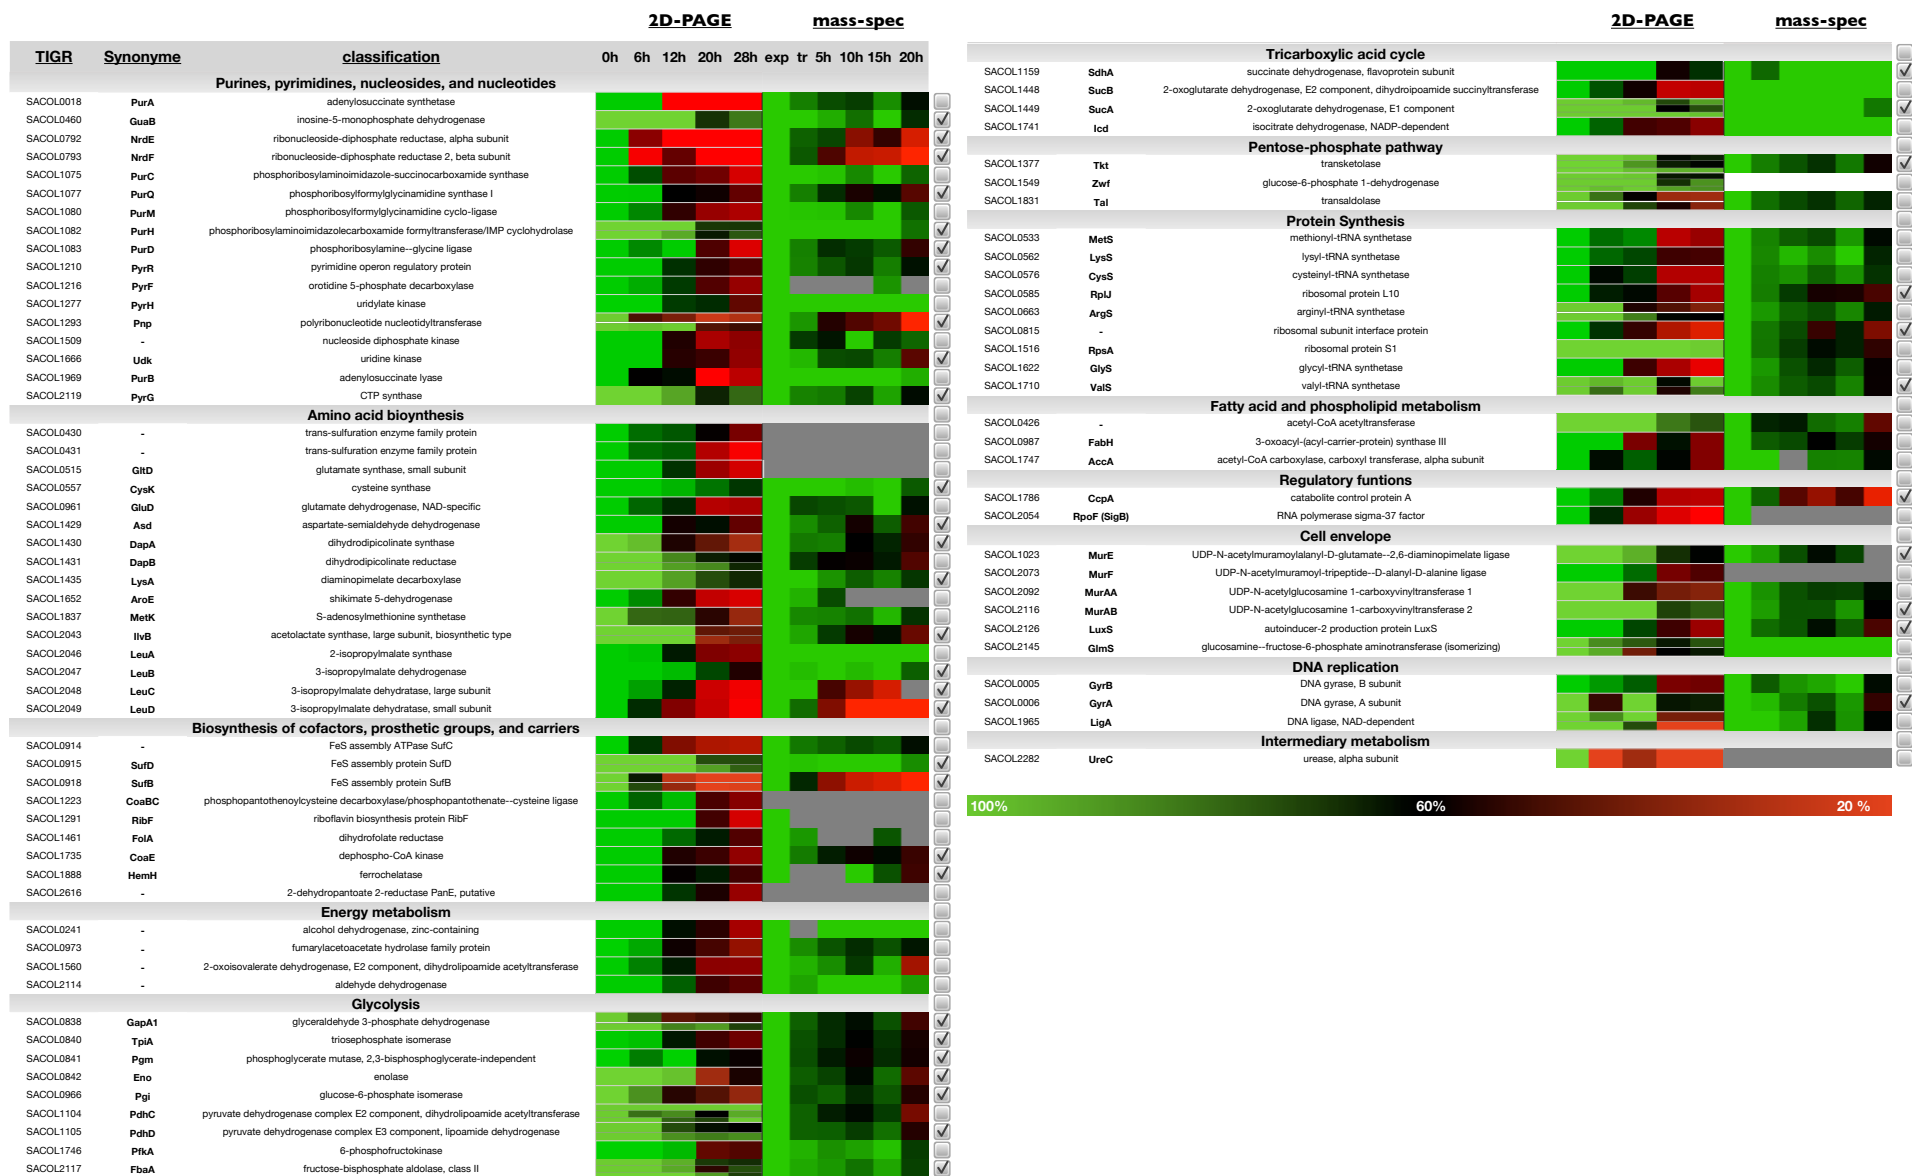

Figure S13

**Figure S13:**

Comparison of results obtained by 2D-PAGE (Michalik *et al.*, 2009) and a MS-based pulse-chase approach.  
red: protein is degraded or protein shifts into non-soluble fraction; green: protein remains stable.
