# Supplementary material
Source: PubMed Central journal article supplement (PMC3434780)
Supplement: supp_M112.017004_FigS14.pdf [file supp_M112.017004_FigS14.pdf]

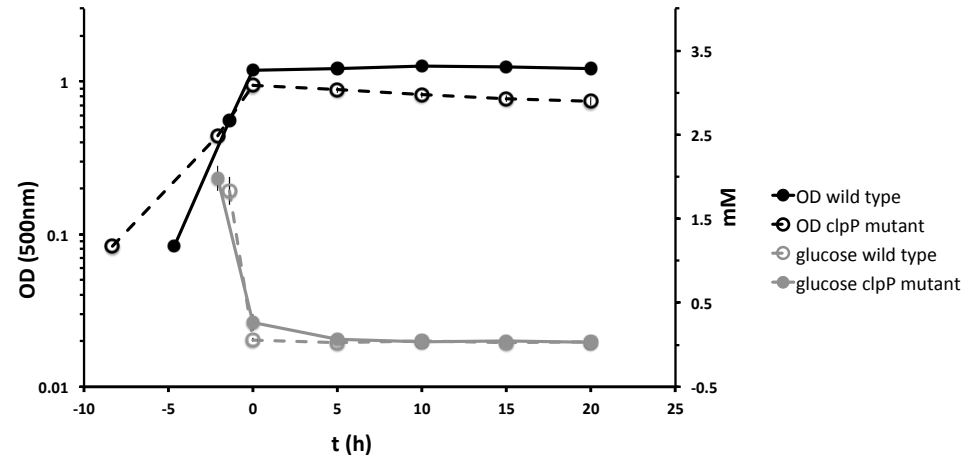

Synthesis level (<sup>12</sup>C) normalized to transient sample point

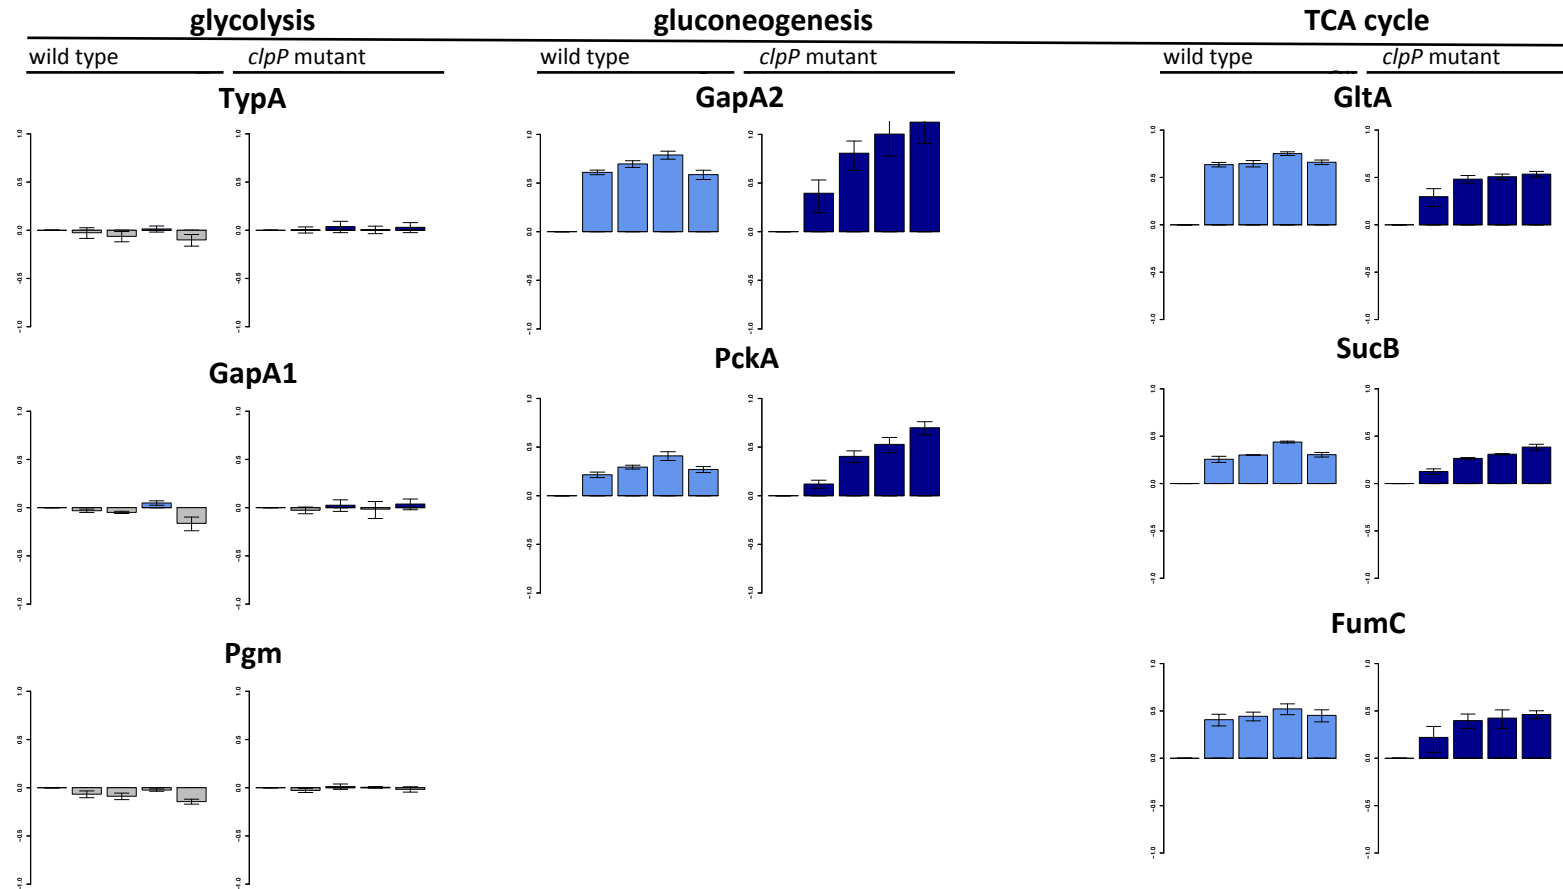

Figure S14

**Figure S14:**

The growth curve is depicted in combination with glucose consumption from the extracellular medium for the wild type and the *clpP* mutant. In addition the *de novo* synthesis ( $^{12}\text{C}/^{15}\text{N}$ , normalized to transient sample time-point) of representative enzymes of glycolysis, gluconeogenesis and the TCA cycle is presented for the wild type and the *clpP* mutant in the stationary growth phase. Values were normalized to the transient phase sample time point.
