# Supplementary material
Source: PubMed Central journal article supplement (PMC3434780)
Supplement: supp_M112.017004_FigS15.pdf [file supp_M112.017004_FigS15.pdf]

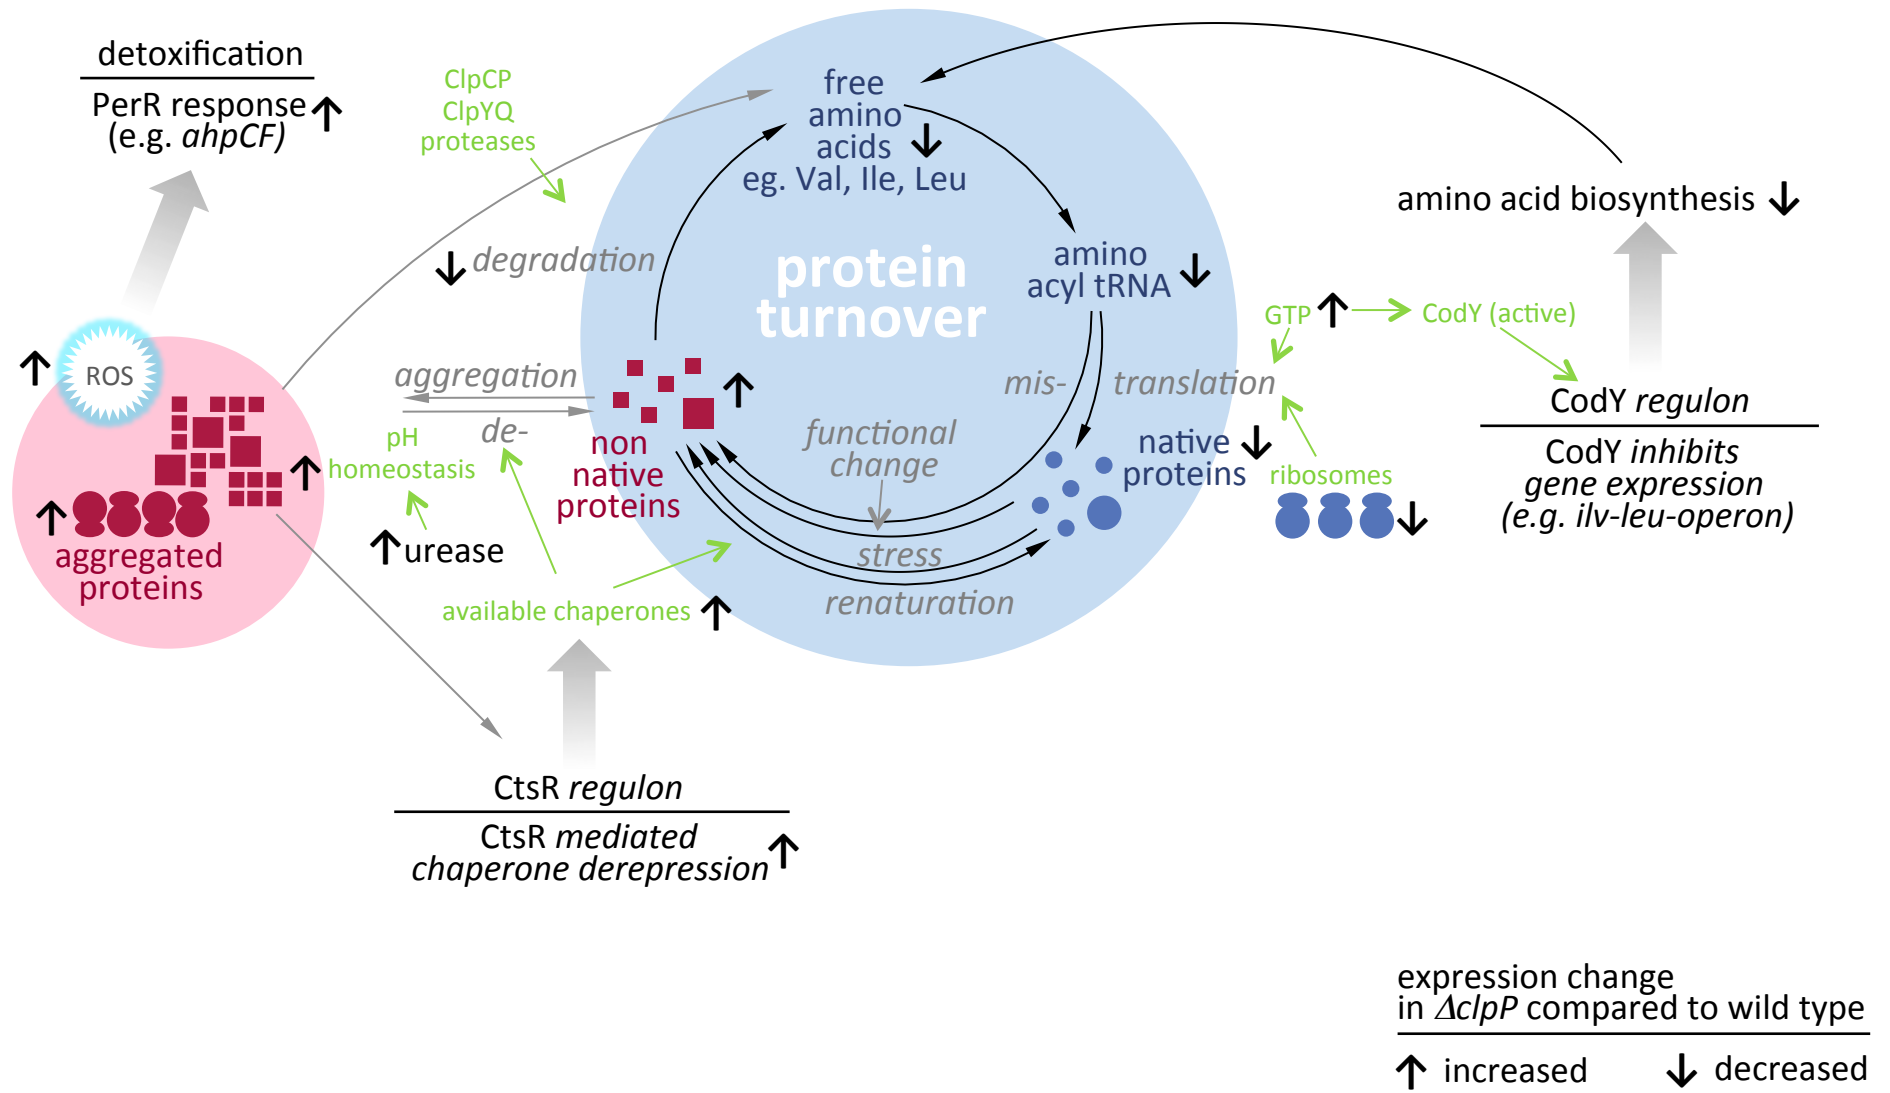

Figure S15

**Figure S15:**

Schematic model of the mechanisms underlying the pleiotropic *clpP* mutant phenotype. Owing to the lack of *clpP* the mutant cells accumulate non-soluble proteins. Consequently, these proteins are no longer able to exert their function. This promotes a higher level of GTP in the cells due to the lower ribosomal activity, which results in a strong repression of CodY-regulated genes. The consequence is a low production of branched-chain amino acids due to low amounts of corresponding biosynthetic enzymes. This leads to a higher level of uncharged tRNA and result in a weak activation of the stringent response, with decreased expression of ribosomal proteins. In addition the protein stress / reactive oxygen species (ROS) production through the protein aggregation leads to a strong induction of the CtsR and PerR -regulons resulting in a high amount of chaperones and detoxification enzymes.
