# Supplementary material
Source: PubMed Central journal article supplement (PMC3434780)
Supplement: supp_M112.017004_FigS16.pdf [file supp_M112.017004_FigS16.pdf]

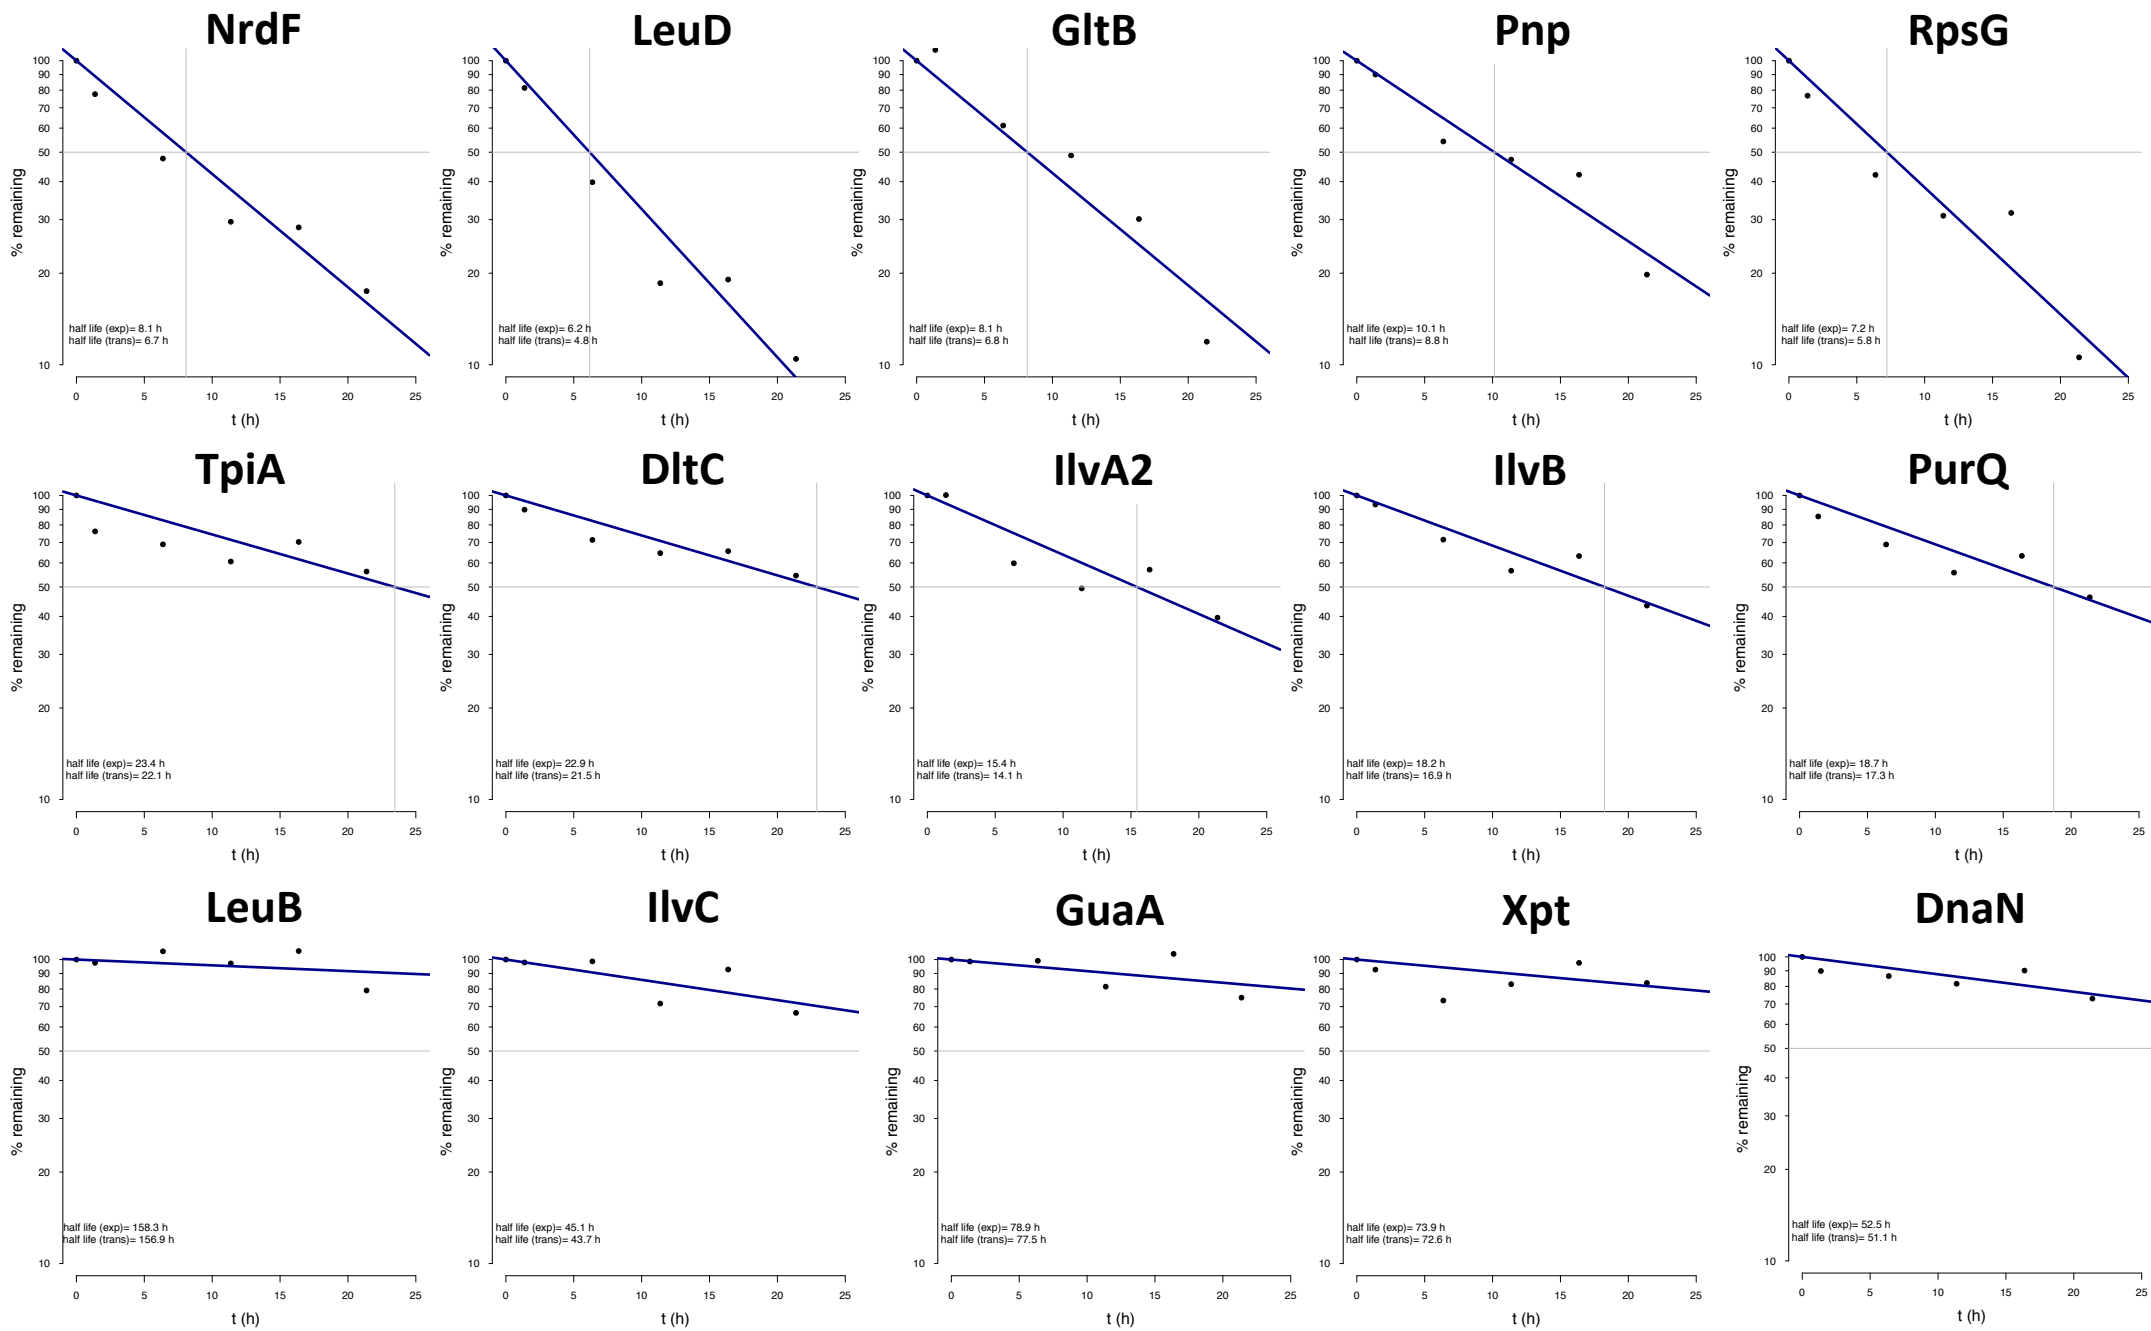

Figure S16

**Figure S16:**

Degradation kinetics and the calculated half-life are depicted for selected vegetative proteins for the soluble fraction. A logarithmic linear regression model was used for the determination of the half-life based on the normalized  $^{13}\text{C}$  value. Therefore the  $^{13}\text{C}/^{15}\text{N}$  – values were corrected against isotopic protein dilution due to growth and normalized against the initial  $^{13}\text{C}/^{15}\text{N}$ -value. [enhanced degradation (first row); intermediate degradation (second row); almost stable proteins (third row)].
